# Supplementary material for: A small RNA that cooperatively senses two stacked metabolites in one pocket for gene control
Source: PubMed Central journal article supplement (PMC8752633; doi:10.1038/s41467-021-27790-8), 2022-01-11
Supplement: 41467_2021_27790_MOESM2_ESM.pdf [file 41467_2021_27790_MOESM2_ESM.pdf]

## Peer Review File

---

Title: A small RNA that cooperatively senses two stacked metabolites in one pocket for gene control

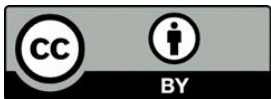

**Open Access** This file is licensed under a Creative Commons Attribution 4.0 International License, which permits use, sharing, adaptation, distribution and reproduction in any medium or format, as long as you give appropriate credit to the original author(s) and the source, provide a link to the Creative Commons license, and indicate if changes were made. In the cases where the authors are anonymous, such as is the case for the reports of anonymous peer reviewers, author attribution should be to 'Anonymous Referee' followed by a clear attribution to the source work. The images or other third party material in this file are included in the article's Creative Commons license, unless indicated otherwise in a credit line to the material. If material is not included in the article's Creative Commons license and your intended use is not permitted by statutory regulation or exceeds the permitted use, you will need to obtain permission directly from the copyright holder. To view a copy of this license, visit <http://creativecommons.org/licenses/by/4.0/>.

<b>REVIEWER COMMENTS</B>

Reviewer #1 (Remarks to the Author):

Wedekind and colleagues present a highly novel crystal structure of a type-I preQ-1 riboswitch that reveals the binding of two ligand that directly interact with one another. In support of their structural analysis, the authors present a detailed calorimetric analysis of cooperative binding in several representative type-I preQ-1 riboswitches to make the case that this unusual mode of ligand binding is highly likely to be a central characteristic of this grouping. Finally, a cell based reporter assay demonstrates that ablation of either ligand binding site causes a significant shift in the extracellular preQ-1 concentration required to elicit the regulatory response. Together, the authors present a solid structure-function analysis that reveals a new mode of ligand recognition in RNA.

Overall, this manuscript is well-written and provides clear and mostly compelling data (see below, with respect to the cell-based assay). The crystallographic and calorimetric data is rigorously analyzed and the authors present a convincing set of conclusions. The figures are also clear and highlight key points in the text well. This work is highly worthy of publication, once the authors address a set of minor points, as follows.

Lines 76-77. I somewhat disagree with the statement “Although several riboswitches can recognize two effectors, these sites are positioned in separate domains”. This essentially comes down to how the authors define “domain” in RNA. I tend to think of a domain as an independently folding element, such as the classic P4-P6 domain of the T. tetrahymena group I intron. In that light some of the two ligand binding riboswitches are single folding domains, such as the THF riboswitch. This RNA clearly folds as a single domain with the main folding center around the 3WJ site that enables the formation of the pseudoknot site. I really don’t think that this detracts from the author’s main point, and they should consider modifying this claim (also made on line 137).

Line 183. Given the nature of the cell-based reporter assay, I would argue that this is a two significant figure experiment rather than three (i.e.,  $90 \pm 3$  nM). Also, I am confused by the assertion that the two phases correspond to a preQ1 binding event based upon the ITC data. What do the authors specifically envision each state to be? I assume they think that the second transition is a single ligand event? If so, why would this event elicit the greatest repression (as opposed to the first event, which contributes moderately). I admit that I am a bit confused by the observed biphasic transition given the degree of cooperativity in binding.

Line 188 – 189. The statement that the riboswitch sensing “acts a ‘dimmer’ switch rather than a ‘digital’ switch” is predicated on the assumption that the concentration of ligand added to the medium is the same as in the cell, which is not known by the authors. For some metabolites, high affinity influx pumps can significantly concentrate the compound and the shape of the curve can reflect the behavior of that component of metabolism. The authors should use caution in interpreting their cell-based data. In the discussion the authors also reiterate this conclusion (lines 206 – 207). I would like to see a more

concrete discussion as to why the authors think that a positively cooperative system leads to a less steep response curve, since this observation is counter to what was hypothesized.

Figure 3. In interpreting the first phase of the transition, the error bars seem quite large and overlap between the two baselines of that transition. I am surprised given the size of the errors in this transition that the stated error is as low as cited.

Reviewer #2 (Remarks to the Author):

The manuscript of Schroeder et al describes the structure of a type I preQ1 riboswitch from *Carnobacterium antarcticus* as well as extensive biophysical characterization to corroborate the structural findings. The main finding is that the aptamer domain of this riboswitch binds two stacked preQ1 molecules, something that had not been observed before. Strong binding data support a cooperative binding model and in vivo data corroborate the importance of the two binding model. Overall, this is a very strong manuscript. The data are of excellent quality and the structure provides new information that helps understand preQ1 riboswitches better. The observation of two binding ligands is novel for riboswitches and helps support several important ideas regarding evolution of function in the RNA world. There are a few minor points that need to be addressed:

1. The authors conclude that binding of two preQ1 molecules is a hallmark of all type I preQ1 riboswitches. While the evidence presented is good, I think a couple of mutagenesis experiments to support it would enhance the manuscript. Similar experiments to the ones done with the Can riboswitch to show the involvement of C31 and U17 but using a different organism would help address this point.
2. A multiple sequence alignment of many preQ1 riboswitches should be added to the Supplemental Materials to highlight the common features.
3. Additional discussion on the differences amongst the three types is needed, highlighting what was learned from the current work.
4. Extended Data Figure 4 is very confusing. Panels mix with each other. The figure needs to be redesigned for additional clarity.

Reviewer #3 (Remarks to the Author):

In this manuscript, Schroeder and co-workers report a detailed structural, biochemical, and biological study describing a Class I preQ1 riboswitch from *Carnobacterium antarcticus* (and providing information more broadly about this class of riboswitch). Remarkably, their crystallographic studies reveal that the riboswitch binds two copies of the preQ1 metabolite, exhibiting positive cooperativity, and stacking directly next to each other in the binding site. Biological studies using a reporter system reveal a “dimmer switch”-type response to ligand over a wide concentration range. This work is notable as it is the first example of an RNA binding to 2 copies of a single metabolite, with implications for riboswitch

evolution, RNA catalysis and potentially synthetic biology as well. The manuscript is highly rigorous and well written and methodology is sound. References are appropriately cited. This work will be of broad interest and will definitely be appropriate for the readers of Nature Communications. I have several minor comments:

1. The title is somewhat misleading. There are other examples of riboswitches that bind 2 different metabolites, but this is notably the first example of a switch that binds 2 molecules of the same metabolite (in the same binding pocket!). More precise language would better emphasize the important advance reported here – I suggest “A small RNA senses its effector in a tandem stacked mode for cooperative gene control” or something similar.

2. It is somewhat non-obvious that the system exhibits positive cooperativity but the response is increased in concentration range (a “dimmer switch”). This is counter to the typical example where positive cooperativity generally results in an increased Hill coefficient (and a reduced range of effect, as noted in the discussion). Can the authors comment further? Note, the Hill coefficient model was developed for enzymes, which are of course a fundamentally different system on several levels. Since this is the first example of a riboswitch that senses 2 copies of a single molecule it has fundamental importance and would be worth discussing for readers outside this specific field interested in this unique biochemical phenomenon.

3. In the case of this example, the SDS is partially embedded within the aptamer domain. However, in Class III preQ1 switches, the SDS is found further outside. Do the authors think such dual binding events as observed here are uniquely effective when the SDS is within the aptamer? This might be worth adding a sentence or two in the discussion.

To be clear, these very minor comments do not dampen enthusiasm for what I consider to be a very strong and rigorous study. I strongly support the publication of this manuscript once the issues above have been addressed.

We thank each of the reviewers for providing detailed and insightful comments to improve the quality of our manuscript. We are especially gratified by the uniformly positive evaluations of the work. Reviewer #1 stated, "... *this manuscript is well-written and provides clear and mostly compelling data... highly worthy of publication ...*". Reviewer #2 wrote, "... *this is a very strong manuscript. The data are of excellent quality and the structure provides new information*". Reviewer #3 wrote, "[the] *manuscript is highly rigorous and well written and methodology is sound ... This work will be of broad interest...*". Moreover, each of the reviewers stated that the work would be suitable for publication following "*minor*" revisions. We have positively addressed all comments as requested with one exception (noted below). As a result, we believe that the manuscript has improved significantly and that the work is now ready for publication.

To track our changes, we created the ensuing point-by-point response. Our responses are in red with specific changes highlighted in yellow (reviewer #1), green (reviewer #2) or cyan (reviewer #3). A marked-up manuscript with color coding for each reviewer is appended to this document. We have also provided our complete written responses following each reviewer's questions (below).

Our noteworthy revisions are summarized as follows:

- i.* The title was changed to be clearer, as requested by rev. #2
- ii.* The abstract was shortened and references were removed to be consistent with the journal style. The Extended Data were moved to Supplementary Information to be consistent with the journal style.
- iii.* A more circumspect approach was taken when interpreting the GFP $\mu$ v assay based on the critiques of rev. #1 and rev #3. Specifically, the interpretation of the in-cell assays as evidence for a dimmer switch response was removed in light of the limitations of this assay (noted in the revision) and positive cooperativity observed in our ITC analysis.
- iv.* We produced a new multisequence alignment as Supplementary Figure 1 based on comments from rev. #2. We described the sequence hallmarks that differentiate the various preQ $_1$ -I riboswitch types in light of the consensus model, the new multisequence alignment and known co-crystal structures.
- v.* We added a new discussion about the prospect that other riboswitches use dual stacked effector recognition, as suggested by rev. #3.
- vi.* Based on our own reading of the manuscript, we found and corrected errors in Fig 1c regarding the highlighted aSDS. We also added a missing H-bond in Fig. 1e (and removed underlying H-bonds for clarity). We corrected an error in the base pairing of Fig. 3b, which now shows the correct SDS-aSDS interaction. We added individual data points to the bar plots in Fig. 3d to match the journal style. We clarified the average  $K_D$  value reported for WT *Can* in the text and the representative metrics shown in 2d. These parameters were updated in Supplementary table 2. Other self-identified minor typos are colored red but remain unhighlighted.
- vii.* We included all of our raw data from ITC and GFP $\mu$ v assays in a single spreadsheet, as per journal policy.
- viii.* We made minor corrections to the Supporting Table 1 of refinement statistics that we discovered during the final stages of PDB deposition.

- ix. We made changes to the Methods to match journal policy and to describe the treatment of errors for EC<sub>50</sub> fitting, based on comments from rev. #1.

The detailed point-by-point responses to reviewers are as follows:

### Reviewer #1 (Remarks to the Author):

Lines 76-77. I somewhat disagree with the statement “Although several riboswitches can recognize two effectors, these sites are positioned in separate domains”. This essentially comes down to how the authors define “domain” in RNA. I tend to think of a domain as an independently folding element, such as the classic P4-P6 domain of the *T. tetrahymena* group I intron. In that light some of the two ligand binding riboswitches are single folding domains, such as the THF riboswitch. This RNA clearly folds as a single domain with the main folding center around the 3WJ site that enables the formation of the pseudoknot site. I really don’t think that this detracts from the author’s main point, and they should consider modifying this claim (also made on line 137).

We agree that the THF riboswitch uses one folding unit. In terms of effector binding, we also agree that two spatially separated sites (i.e., a 3-way junction and a pseudoknot region) are used to recognize individual effectors. However, our rationale was that each site fits the definition of a ‘domain’ as described by [Pley *et al.* (1994) *Nature* **372**, 68-74]. In this manuscript, McKay and co-workers state, “a hammerhead RNA-DNA ribozyme-inhibitor complex at 2.6 Å resolution reveals that the base-paired stems are A-form helices and that the core has two structural domains. The first domain is formed by the sequence 5'-CUGA following stem I and is a sharp turn identical to the uridine turn of transfer RNA, whereas the second is a non-Watson-Crick three-base-pair duplex with a divalent-ion binding site”. There is a detailed description of *domain I* and *domain II* in this paper. As such, this represents a somewhat different perspective about a domain. Obviously, unlike the THF riboswitch, the *Can* riboswitch’s binding sites are not spatially separated. We simply wanted to convey the latter point, but we see how our nomenclature could be confusing to the audience. The reviewer’s concept of a domain is also more rigorous and is widely accepted by the structural biology community.

To avoid ambiguities, we changed our text to state (new lines 75-78) “Although several riboswitches can recognize two effectors, these **binding pockets are spatially separated**<sup>30-35</sup>. In this respect, the *Can* preQ<sub>1</sub>-I<sub>1</sub> riboswitch is exceptional because the metabolites stack tandemly, forming an unprecedented ligand-ligand interface **within a single pocket**.” These changes avoid the definition of a “domain” while clarifying our meaning.

Similarly, we changed line 137: “Although other riboswitches bind two effectors, these examples involve distinct **binding pockets** that spatially separate the ligands<sup>4, 6, 7, 43</sup>”

On Line 139 we added: “recognition of two interacting ligands in a single aptamer **pocket** is unprecedented in RNA biology.”

Line 216 of the Discussion. We clarified, “We described the structure and cooperative binding of a small riboswitch that senses two stacked effectors **in a single binding pocket**.”

Line 183. Given the nature of the cell-based reporter assay, I would argue that this is a two significant figure experiment rather than three (i.e., 90 ± 3 nM).

We agree that two significant figures are more appropriate. We have changed all  $EC_{50}$  measurements reported in the text (e.g., line 190 & 193) to reflect this point. In **Supplementary Table 4**, we changed the number of significant figures to two as well.

Also, I am confused by the assertion that the two phases correspond to a preQ1 binding event based upon the ITC data. What do the authors specifically envision each state to be? I assume they think that the second transition is a single ligand event? If so, why would this event elicit the greatest repression (as opposed to the first event, which contributes moderately). I admit that I am a bit confused by the observed biphasic transition given the degree of cooperativity in binding.

Given the concern of reviewer #1 and #3 on this topic and comments below, we have taken a more circumspect interpretation of the two-phase dose response curve. Accordingly, we removed suggestions that the two-phase binding curve represents two discrete binding events of the preQ<sub>1</sub> metabolite, which appears to be an overinterpretation of the data. We thank the reviewer for pointing this out. Accordingly, we have made the following changes to the text:

Lines 81-83. We deleted, “~~Unexpectedly, the Can preQ<sub>1</sub>-I<sub>1</sub> riboswitch showed an extended effector sensing range that is more akin to a dimmer switch than a digital switch<sup>27,36</sup>.~~”

Lines 80-81. We added the following text instead: “Mutants at each effector site reduce binding affinity and raise the concentration of preQ<sub>1</sub> required for gene repression in a bacterial reporter assay.”

Line 192-193. To clarify the binding by the preQ<sub>1</sub>-II riboswitch, “for the *Lactobacillus rhamnosus* (Lrh) preQ<sub>1</sub>-II riboswitch<sup>37</sup>, which binds a single ligand with an  $EC_{50}$  of 15 nM<sup>13</sup>”.

Lines 195-197. We changed the text to be more cautious, “Notably, the Can riboswitch sensing range is broader than the Lrh riboswitch in this assay, suggesting that it detects preQ<sub>1</sub> over a wider range of effector concentrations. At present, the basis for this apparent sensing difference is uncertain (see below).”

Line 200-204. We removed emphasis on the growth curve, “In accord with ITC data, C17U and C31U mutants each showed poorer  $EC_{50}$  values that were ~60-fold higher and ~210-fold higher than WT (Figs. 3c-e & Supplementary Table 4). While each mutant retains dual binding in vitro, the elevated  $EC_{50}$  values imply that preQ<sub>1</sub> levels must be significantly higher inside cells to elicit an efficient gene-regulatory response, underscoring the importance of each effector binding site for gene regulation.”

The observation that one phase of the biphasic WT curve seems to impart more gene regulatory activity than the other is a keen one. Although we agree that we cannot directly relate our *in vitro* ITC data to our cell assay, our structure suggests that the  $\beta$  effector could provide a platform on which the ceiling can stack, thus ordering the P2 region and stabilizing the gene-off state. This prediction is supported by the observation that the C31U mutant regulates gene expression more poorly than C17U.

Lines 205-212: We added a passage that relates our in-cell mutant data to our structure. We wrote, “Although our data cannot differentiate a preferred order of preQ<sub>1</sub> binding, impairment of the  $\beta$  site had a more pronounced effect on gene regulation (Figs. 3d,e). While C17U elicited a 6-fold repression, the C31U variant repressed GFP<sub>uv</sub> expression by only 2-fold (Figs. 3d,e). This functional disparity — also reflected by poorer C31U  $K_{D1}$  and  $K_{D2}$  values (Supplementary

**Table 3**) — could be due to the requirement of the  $\beta$  effector to serve as a scaffold that supports the binding pocket ceiling via stacking (**Fig. 1f**). In this manner, the  $\beta$  site orders P2 in the gene off state while binding at the  $\alpha$  site either orders the  $\beta$  site pocket or stabilizes effector binding at the  $\beta$  site.”

We addressed the interpretation of the biphasic curve in more detail in the next point.

Line 188 – 189. The statement that the riboswitch sensing “acts a ‘dimmer’ switch rather than a ‘digital’ switch” is predicated on the assumption that the concentration of ligand added to the medium is the same as in the cell, which is not known by the authors. For some metabolites, high affinity influx pumps can significantly concentrate the compound and the shape of the curve can reflect the behavior of that component of metabolism. The authors should use caution in interpreting their cell-based data. In the discussion the authors also reiterate this conclusion (lines 206 – 207). I would like to see a more concrete discussion as to why the authors think that a positively cooperative system leads to a less steep response curve, since this observation is counter to what was hypothesized.

We see the reviewer’s point and believe it is worth mentioning in the main text. As such, we revised the text to more circumspectly consider the GFPuv assay results and the positive cooperativity measured by ITC. We also added a statement that competition between preQ<sub>1</sub> and other metabolites could affect the shape of the dose-response curve. We noted that other riboswitches interact with other metabolites in a cellular context, as reported for the *glmS* riboswitch/ribozyme [Watson, P. Y. & Fedor, M. J. *Nat. Struct. Mol. Biol.* **18**, 359-363 (2011)].

Lines 229-238 state:

“Cooperative riboswitches are posited to show a steep “digital” dose-response<sup>2</sup>  
<sup>42, 43</sup>, yet the *Can* riboswitch exhibits a broad, biphasic dose-response in our in-cell GFPuv assay despite the positive cooperativity we observe in our ITC analysis (**Supplementary Table 3**). Although it is tempting to associate each transition in our GFPuv assay with an individual preQ<sub>1</sub> binding event, the intracellular concentration of preQ<sub>1</sub> is not known in such assays and depends on multiple factors, such as the efficacy of 7-deazapurine transporters<sup>44,45</sup>. Additionally, we cannot rule out possible competition between preQ<sub>1</sub> and other metabolites in the cellular milieu<sup>46</sup>, as observed for the *glmS* riboswitch<sup>47</sup>. These, or other factors, likely influence the shape of the *Can* riboswitch dose-response curve (**Fig. 3c**); nevertheless, the preQ<sub>1</sub>-I<sub>1</sub> riboswitch is expected to maintain positive cooperativity inside the cell<sup>46</sup>.”

Figure 3. In interpreting the first phase of the transition, the error bars seem quite large and overlap between the two baselines of that transition. I am surprised given the size of the errors in this transition that the stated error is as low as cited.

This is an excellent observation and we see the reviewer’s point. **Fig. 3c** depicts the average of three datasets with the standard error of the mean shown for each point. In response to the reviewer’s question, we contacted GraphPad for insight into how best to address this question and whether we used an appropriate approach. The representative recommended that we employ the “compare datasets” function to assess whether each replicate in a dataset should be analyzed in separate columns or together in sub-columns using GraphPad. Indeed, the different modes of analysis alter how the software calculates the errors. In the case of the WT *Can* datasets, the software recommended analyzing each dataset separately. For the other constructs, the software recommended analyzing all three replicates together in sub-columns.



As a result, we now report the standard error between the three separately determined EC<sub>50</sub> values for WT *Can*. (Line 190) The new EC<sub>50</sub> parameters for the WT *Can* construct using two significant figures are:

EC<sub>50,1</sub> = 96 ± 14 nM (previously 86 ± 3 nM)

EC<sub>50,2</sub> = 7100 ± 360 nM (previously 6800 ± 200 nM)

Although the values did not change appreciably, the errors did increase and are more in line with what is expected from the curves shown in **Fig. 3c**. The graph shown in **Fig. 3c** remains the same even though these new errors are used.

We also changed the EC<sub>50,1</sub> and EC<sub>50,2</sub> values in **Supplementary Table 4** and recalculated the Fold EC<sub>50</sub> change metrics reported in Fig. 3e based on this comment

Lines 473-475: We added brief description of the GraphPad consideration in the Methods, “*The replicates in each construct were compared using the “compare datasets” function before analysis.*”

#### Reviewer #2 (Remarks to the Author):

1. The authors conclude that binding of two preQ<sub>1</sub> molecules is a hallmark of all type I preQ<sub>1</sub> riboswitches. While the evidence presented is good, I think a couple of mutagenesis experiments to support it would enhance the manuscript. Similar experiments to the ones done with the *Can* riboswitch to show the involvement of C31 and U17 but using a different organism would help address this point.

We appreciate the reviewer’s suggestion for more experiments; however, we believe that sufficient evidence already exists based upon our current analysis and the addition of a new multisequence alignment (recommended by reviewer #2 in the next point). Our rationale is that the cost-to-benefit ratio for such new experiments will be large given the time and resources involved. Specifically, these experiments are not standard ITC experiments because they require large amounts of RNA and preQ<sub>1</sub> for the VP-ITC due to the poor *K<sub>D</sub>* values of mutants, as well as the need to capture the full parabolic character of cooperative binding for analysis by our Python program.

As the reviewer noted, “*the evidence presented is good*” and we believe such experiments would be merely incremental. The reviewer’s suggestion of a multisequence alignment combined with the existing consensus model strongly bolsters our conclusion that all type I preQ<sub>1</sub> riboswitches appear to use dual, stacked effector recognition. Indeed, nucleotides that engage in preQ<sub>1</sub> binding at the *Can* riboswitch α and β sites are 97% conserved based on all known type I sequences (>1,500 representatives) [McCown, P. J., Liang, J. J., Weinberg, Z. & Breaker, R. R. *Chem Biol* **21**, 880-889 (2014).].

As the reviewer observed, our existing experimental data firmly support the requirement for nucleotides C17 and C31 at the respective α and β sites for dual preQ<sub>1</sub> binding and function. With the benefit of our new *Can* preQ<sub>1</sub>-I<sub>1</sub> riboswitch co-crystal structure, it is clear that all known type I riboswitch sequences possess these two bases — and other nucleotides — required for α and β site recognition. Please see new **Supplementary Fig. 1a**.

Moreover, our manuscript also demonstrates that the WT *Can*, *Ngo* and *Hin* preQ<sub>1</sub>-I<sub>1</sub> riboswitches —spanning multiple phyla — each bind two preQ<sub>1</sub> molecules based on ITC. All three species show the characteristic parabolic response to preQ<sub>1</sub> when the experiment is performed at 37 °C (**Supplementary Figs. 5a,g,h**), which is best described by a two-interdependent-sites binding model (**Supplementary Fig. 5b**) wherein the macroscopic cooperativity constants,  $\gamma$ , support positive cooperativity (**Supplementary Table 2**). Collectively the data suggest that the mode of binding is the same in all three sequences (**Supplementary Fig 6a**), and that this analysis extends to the entire type I subclass (**Supplementary Fig. 1a**).

2. A multiple sequence alignment of many preQ<sub>1</sub> riboswitches should be added to the Supplemental Materials to highlight the common features.

We agree with the reviewer and we have added a multiple sequence alignment in new **Supplementary Fig. 1**. We carefully selected phylogenetically diverse sequences from each type of class I preQ<sub>1</sub> riboswitch to provide the greatest diversity — albeit type III is found almost exclusively in gamma proteobacteria. These sequence alignments and the consensus models — which were derived from all known representatives analyzed by McCown *et al.* [McCown, P. J., Liang, J. J., Weinberg, Z. & Breaker, R. R. *Chem Biol* **21**, 880-889 (2014).] — collectively illustrate that the nucleobases involved in type I recognition are absolutely conserved but are absent in type II and type III preQ<sub>1</sub>-I riboswitches.

To accentuate differences in the signature residues engaged in preQ<sub>1</sub> binding by the type I and type II preQ<sub>1</sub>-I riboswitches, our new figure includes sequences from riboswitches that were crystallized previously (bolded genus and species). In the columns above each base, we denoted positions that contact each preQ<sub>1</sub> effector (bolded) and positions that form the P1 helix (underlined). The structural mapping upon the riboswitch sequences nicely explains the type I and type II covariation models [McCown, P. J., Liang, J. J., Weinberg, Z. & Breaker, R. R. *Chem Biol* **21**, 880-889 (2014).]. Importantly, the type I covariation model considers >1,500 sequences and our crystallographic data account for why specific bases are conserved (i.e., because they engage in  $\alpha$  and  $\beta$ -site preQ<sub>1</sub> recognition). For the sake of brevity, we chose to sample a small number of diverse sequences, although the covariation models — also included in the figure — were derived from all sequence representatives from each riboswitch type [adapted from McCown *et al.* & Breaker (2014) *Chem & Biol* **21**, 880].

For type III riboswitches, there is no crystallographic data to indicate which nucleobases contact preQ<sub>1</sub> beyond the conserved cytidine in loop L2 — which presumably contacts the WC face of preQ<sub>1</sub> [McCown, P. J., Liang, J. J., Weinberg, Z. & Breaker, R. R. *Chem Biol* **21**, 880-889 (2014).]. However, the alignment and consensus model clearly indicate that nucleobases required for beta site preQ<sub>1</sub> recognition are absent. Moreover, we previously published ITC data from a representative type III riboswitch and found 1:1 binding stoichiometry [Lieberman, J. A., Bogue, J. T., Jenkins, J. L., Salim, M. & Wedekind, J. E. ITC analysis of ligand binding to preQ<sub>1</sub> riboswitches. *Meth. Enzymol.* **549**, 435-50 (2014).].

The new supplementary figure legend states:

**Supplementary Figure 1 | Covariation model and multisequence alignments of preQ<sub>1</sub> class I riboswitches. (a)** Type I Covariation models generated from the full group of known sequence representatives (adapted from ref. 2); red, black and gray positions indicate 97%, 90% and 75% sequence conservation. Multisequence alignments were generated using a handful of representatives derived from phylogenetically diverse bacteria (reported by McCown *et al.*<sup>2</sup>). Positions in bold within the alignment recognize preQ<sub>1</sub> based on the *C. antarcticus* co-crystal structure of this investigation. PreQ<sub>1</sub> binding nucleobases at the  $\alpha$  and  $\beta$  sites are each denoted

in the covariation model and the sequence alignment as  $\alpha$  or  $\beta$ . Here and elsewhere, bolded organisms have been structurally characterized (this work). In addition to the greatest number of representative sequences (indicated in italics), preQ<sub>1</sub>-I<sub>II</sub> riboswitches exhibit the greatest taxonomic diversity<sup>2</sup>. (b) same as (a), but with type II sequences. Characterized sequences are *T. tencongensis*<sup>3, 4</sup> and *B. subtilis*<sup>2</sup>. Asterisks denote conserved preQ<sub>1</sub> recognition positions. (c) same as (a) and (b) but with type III sequences. Due to a lack of structural characterization, the canonical specificity base is the only predicted preQ<sub>1</sub> recognition position<sup>2</sup>. Alignments were created in JALVIEW<sup>6</sup>.”

3. Additional discussion on the differences amongst the three types is needed, highlighting what was learned from the current work.

We agree with the reviewer, and have added the following paragraph to the first paragraph of our discussion:

The new text describing this analysis is on Lines 216-228:

“We described the structure and cooperative binding of a small riboswitch that senses two stacked effectors *in a single binding pocket*. Examination of all known preQ<sub>1</sub>-I sequences encompassing multiple phyla revealed that nucleobases that compose the  $\alpha$  and  $\beta$  binding sites are conserved only within preQ<sub>1</sub>-I<sub>II</sub> sequences (Supplementary Fig. 1). In contrast, only nucleobases associated with  $\alpha$  site recognition are conserved within preQ<sub>1</sub>-I<sub>II</sub> sequences, consistent with known *Tte* and *Bsu* riboswitches structures (Supplementary Figs. 1b, 4b,c & 6) and previous bioinformatic analysis<sup>20</sup>. Although experimental analysis of the preQ<sub>1</sub>-I<sub>III</sub> riboswitch is sparse, it appears that nucleobases associated with  $\alpha$  site recognition are conserved in preQ<sub>1</sub>-I<sub>II</sub> representatives, but not those associated with  $\beta$  site recognition (Supplementary Fig. 1c). This is consistent with previous ITC experiments, which demonstrated that this riboswitch binds with a 1:1 stoichiometry<sup>41</sup> — like preQ<sub>1</sub>-I<sub>II</sub> representatives. Accordingly, the unprecedented mode of dual effector recognition appears to be a hallmark of the most common and taxonomically diverse preQ<sub>1</sub> riboswitch group<sup>30, 35</sup>, the preQ<sub>1</sub>-I<sub>II</sub> riboswitch, which has been overlooked until now.”

4. Extended Data Figure 4 is very confusing. Panels mix with each other. The figure needs to be redesigned for additional clarity.

We understand the reviewer’s concern. As requested, we reformatted the figure to clearly differentiate among the panels. In the revision, we rearranged the ITC panels, increased the spacing between them and made the schematic diagram larger, thus increasing the readability. The revised figure is presented as **Supplementary Fig. 5**.

#### Reviewer #3 (Remarks to the Author):

1. The title is somewhat misleading. There are other examples of riboswitches that bind 2 different metabolites, but this is notably the first example of a switch that binds 2 molecules of the same metabolite (in the same binding pocket!). More precise language would better emphasize the important advance reported here – I suggest “A small RNA senses its effector in a tandem stacked mode for cooperative gene control” or something similar.

We agree with the reviewer that the title (which must be fifteen-words or less) should convey better the novel mode of effector recognition. We believe we have captured this point with the new title:

### **A small RNA that cooperatively senses two stacked metabolites in one pocket for gene control**

2. It is somewhat non-obvious that the system exhibits positive cooperativity but the response is increased in concentration range (a “dimmer switch”). This is counter to the typical example where positive cooperativity generally results in an increased Hill coefficient (and a reduced range of effect, as noted in the discussion). Can the authors comment further? Note, the Hill coefficient model was developed for enzymes, which are of course a fundamentally different system on several levels. Since this is the first example of a riboswitch that senses 2 copies of a single molecule it has fundamental importance and would be worth discussing for readers outside this specific field interested in this unique biochemical phenomenon.

In response to this comment and those from reviewer 1, we have altered our interpretation of the in-cell experiments. Upon reflection, we agree with rev. #1 that it is not possible to relate the observed positive cooperativity from ITC to the curve shapes derived from the GFP<sub>uv</sub> reporter assay for the reasons s/he stated. There are several reasons for this:

1. We do not know the intracellular preQ<sub>1</sub> concentration.
2. We do not know the efficiency of associated 7-deazapurine influx transporters.
3. The experiment takes place in a complex cellular environment. In this scenario, preQ<sub>1</sub> likely competes with other metabolites for binding, altering the apparent concentration of preQ<sub>1</sub> needed to elicit a specific regulatory response.

Our response to reviewer #1 in this regard appears on Lines 231-241. We wrote:

<sup>42, 43</sup> “Cooperative riboswitches are posited to show a steep “digital” dose-response<sup>2</sup>, yet the Can riboswitch exhibits a broad, biphasic dose-response in our in-cell GFP<sub>uv</sub> assay despite the positive cooperativity we observe in our ITC analysis (Supplementary Table 3). Although it is tempting to associate each transition in our GFP<sub>uv</sub> assay with an individual preQ<sub>1</sub> binding event, the intracellular concentration of preQ<sub>1</sub> is not known in such assays and depends on multiple factors, such as the efficacy of 7-deazapurine transporters<sup>44,45</sup>. Additionally, we cannot rule out possible competition between preQ<sub>1</sub> and other metabolites in the cellular milieu<sup>46</sup>, as observed for the glmS riboswitch<sup>47</sup>. These, or other factors, likely influence the shape of the Can riboswitch dose-response curve (Fig. 3c); nevertheless, the preQ<sub>1</sub>-I<sub>1</sub> riboswitch is expected to maintain positive cooperativity inside the cell<sup>46</sup>.”

However, as rev. #3 suggested, we also considered the benefits of positive cooperativity for gene regulation. This discussion provides background and context for the broader community.

On lines 239-251 of the Discussion we wrote,

“Our data allow us to conclude that dual-effector recognition is critical for efficient gene regulation by preQ<sub>1</sub>-I<sub>1</sub> riboswitches — as indicated by the deleterious effects caused by specific  $\alpha$  and  $\beta$  site mutants. However, we can only speculate on the reason why cooperativity evolved in preQ<sub>1</sub>-I<sub>1</sub> riboswitches but not in other types or classes of the preQ<sub>1</sub> riboswitch family. Our data suggest that the level of regulation attained is similar between the preQ<sub>1</sub>-I<sub>1</sub> Can riboswitch and the preQ<sub>1</sub>-II Lrh riboswitch, despite differences in preQ<sub>1</sub> binding stoichiometry<sup>37, 48</sup> (Fig. 3d). This result suggests that these two disparate riboswitch folds evolved equally effective chemical networks to sense a common effector for gene regulation. Yet, cooperativity is expected to provide notable benefits in regulation efficiency. One such advantage is that gene expression is

permitted when metabolite levels are low (Fig. 3b, middle panel), while assuring the ability to quickly attenuate expression before excess effector accrues in the cell<sup>46</sup>. This is reasonable considering that many preQ<sub>1</sub>-I<sub>1</sub> riboswitches control the translation of transporters that salvage Q-precursor metabolites from the extracellular environment<sup>23, 28, 49</sup>.”

3. In the case of this example, the SDS is partially embedded within the aptamer domain. However, in Class III preQ<sub>1</sub> switches, the SDS is found further outside. Do the authors think such dual binding events as observed here are uniquely effective when the SDS is within the aptamer? This might be worth adding a sentence or two in the discussion.

The reviewer raises a very interesting point. We have added the following brief paragraph on Lines 252-264 that considers this possibility. We also took the last sentence from the previous version of the manuscript and added it here to close the paragraph.

“Although the Can and Lrh riboswitches differ in terms of binding stoichiometry and overall fold, each positions its expression platform near the binding pocket. This organization raises the question of whether dual, stacked metabolite binding could be effective to regulate folds in which the aptamer is located distally from the expression platform. PreQ<sub>1</sub>-III riboswitches exemplify this organization, wherein the expression platform can be as far as 40 Å away from the aptamer<sup>38</sup>. Communication between the single-effector pocket and an orthogonal SDS-antiSDS helix is mediated by an A minor base that makes a T-shaped contact with the edge of preQ<sub>1</sub><sup>38</sup> (Supplementary Fig. 4e). The preQ<sub>1</sub>-II riboswitch uses a similar pocket<sup>37</sup> and the A-minor base was shown to be essential for gene-regulatory function<sup>40</sup>. It is conceivable that dual, stacked effector recognition could be used by the preQ<sub>1</sub>-III riboswitch fold, if the effectors promoted coaxial helical stacking, and one or both were detected by an A-minor motif. Accordingly, we predict that additional riboswitches that bind dual, stacked effectors exist in nature.”

We also modified the figure legend of **Supplementary Figure 4e** to support the A-minor statements added in the main text.

“A70 and A84 are inclined A-minor bases that originate from an orthogonal A-form helix that abuts the effector edge<sup>8, 9</sup>. In the preQ<sub>1</sub>-II riboswitch, these bases are important for gene regulation and dynamics<sup>10-12</sup>.”

To be clear, these very minor comments do not dampen enthusiasm for what I consider to be a very strong and rigorous study. I strongly support the publication of this manuscript once the issues above have been addressed.

We thank the reviewer for this clarification and appreciate the thoughtful review. We thank the other reviewers as well.

1  
2  
3  
4  
5  
6  
7  
8  
9  
10  
11  
12  
13  
14  
15  
16  
17  
18  
19  
20  
21  
22  
23  
24  
25  
26

**A small RNA that cooperatively senses two stacked metabolites in one pocket for  
gene control**

Griffin M. Schroeder<sup>1,2</sup>, Chapin E. Cavender<sup>1,2</sup>, Maya E. Blau<sup>3</sup>, Jermaine L. Jenkins<sup>1,2</sup>, David H. Mathews<sup>1,2</sup> and Joseph E. Wedekind<sup>1,2</sup>

<sup>1</sup> *Department of Biochemistry & Biophysics, University of Rochester School of Medicine & Dentistry, Rochester, NY 14642, USA.*

<sup>2</sup> *Center for RNA Biology, University of Rochester School of Medicine & Dentistry, Rochester, NY 14642, USA.*

<sup>3</sup> *University of Rochester, 120 Trustee Road, Rochester, NY 14627, USA.*

*To whom correspondence should be addressed. Tel: +1 585 273 4516;  
Email: joseph.wedekind@rochester.edu*

**ORCID's:** 0000-0001-6354-752X (GMS), 0000-0002-5899-7953 (CEC), 0000-0002-8948-4982(MEB), 0000-0003-2548-3275 (JLJ), 0000-0002-2907-6557 (DHM) and 0000-0002-4269-4229 (JEW)

27 **Abstract**

28 Riboswitches are structured non-coding RNAs often located upstream of essential genes in  
29 bacterial messenger RNAs. Such RNAs regulate expression of downstream genes by  
30 recognizing a specific cellular effector. **Although** nearly 50 **riboswitch classes are known, only a**  
31 **handful recognize multiple effectors.** Here, we report the 2.60-Å resolution co-crystal structure of  
32 a class I type I preQ<sub>1</sub>-sensing riboswitch that reveals two effectors stacked atop one another in  
33 a single **binding pocket.** **These effectors** bind with positive cooperativity *in vitro* and **both**  
34 **molecules are necessary for gene regulation** in bacterial cells. **Stacked effector** recognition  
35 appears to be a hallmark of the largest subgroup of preQ<sub>1</sub> riboswitches, including those from  
36 pathogens such as *Neisseria gonorrhoeae*. We postulate that binding to stacked effectors arose  
37 in the RNA World to closely position two substrates for RNA-mediated catalysis. These findings  
38 expand known effector recognition capabilities of riboswitches and have implications for  
39 antimicrobial development.

40

## 41 Introduction

42 Riboswitches are found primarily in the 5' leader sequences of bacterial mRNAs where  
43 they regulate the expression of genes by recognizing a cognate effector<sup>1-3</sup>. These RNA-control  
44 elements usually comprise two domains: an aptamer that recognizes a metabolite with high  
45 specificity and an expression platform that contains gene-regulatory sequences<sup>1</sup>. Upon ligand  
46 binding, the expression platform undergoes conformational changes that alter the accessibility  
47 of key regulatory regions, such as the Shine-Dalgarno sequence (SDS), which must be  
48 unobstructed to initiate translation<sup>3</sup>. Direct observation of ligand-mediated transitions in  
49 riboswitches has enriched our understanding of RNA allostery and folding<sup>4-7</sup>. Riboswitches are  
50 also promising antimicrobial targets due to their presence in numerous human pathogens<sup>2</sup> and  
51 the finding that riboswitch dysregulation can compromise bacterial virulence<sup>8</sup>.

52 PreQ<sub>1</sub>-I (class I) riboswitches are the founding group of bacterial gene regulators that  
53 control the cellular concentration of queuosine (Q)<sup>9</sup> (**Fig. 1a**) — a hypermodified 7-deazapurine  
54 nucleobase required for translational fidelity in mammals and bacteria<sup>10-12</sup>. Although Q is not  
55 essential in bacteria, Q deficiency is associated with slow mid-log growth<sup>13</sup>, compromised  
56 stationary-phase viability<sup>11</sup> and loss of virulence<sup>14</sup>. Previous preQ<sub>1</sub>-I riboswitch structures  
57 revealed an H-type pseudoknot fold, which recognizes a single preQ<sub>1</sub> ligand that completes  
58 coaxial stacking between flanking helices, thus stabilizing the expression platform<sup>15-18</sup>. The small  
59 size and well-defined fold of this class have spurred investigations of its folding and dynamics<sup>4,</sup>  
60 <sup>15, 19, 20 21</sup>, effector specificity<sup>22, 23</sup>, the ligand-free to bound-state transition<sup>4, 18, 19, 22, 24</sup> and  
61 targeting with drug-like molecules<sup>25, 26</sup>. Multiple bacterial species exhibit 1:1 riboswitch-to-preQ<sub>1</sub>  
62 stoichiometry<sup>15-18, 22, 25, 27</sup>, which is the prevailing ligand-binding mode of most riboswitches<sup>2</sup>.

63 Importantly, the latter preQ<sub>1</sub>-I riboswitch analyses have considered relatively few  
64 sequences. Recent work further classified preQ<sub>1</sub>-I riboswitches into three subgroups called  
65 types I-III<sup>28</sup>. Inspection of the associated consensus models reveals that types I and II adopt  
66 similar secondary structures (**Fig. 1b & Supplementary Figure 1a,b**). Although preQ<sub>1</sub>-I<sub>II</sub> (type



67 II) sequences prefer adenosine before the cytidine specificity base, preQ<sub>1</sub>-I<sub>I</sub> sequences prefer  
68 uracil followed by CUA in the 3'-expression platform<sup>23, 28</sup>. This observation and the results we  
69 describe in this study suggest that all previously studied sequences are preQ<sub>1</sub>-I<sub>II</sub> riboswitches.  
70 Importantly, preQ<sub>1</sub>-I<sub>I</sub> riboswitches, found in gram-positive and -negative bacteria, are more  
71 represented than all other preQ<sub>1</sub> riboswitch subgroups and classes combined<sup>28</sup>.

72 To elucidate the gene-regulatory properties of preQ<sub>1</sub>-I<sub>I</sub> riboswitches, we determined the  
73 co-crystal structure of a preQ<sub>1</sub>-I<sub>I</sub> riboswitch from *Carnobacterium antarcticus*<sup>29</sup> (*Can*). The H-type  
74 pseudoknot structure unexpectedly reveals two bound preQ<sub>1</sub> effectors in a single aptamer (**Fig.**  
75 **1c, d**). Although several riboswitches can recognize two effectors, these **binding pockets are**  
76 **spatially separated**<sup>31-36</sup>. In this respect, the *Can* preQ<sub>1</sub>-I<sub>I</sub> riboswitch is exceptional because the  
77 metabolites stack tandemly, forming an unprecedented ligand-ligand interface **within a single**  
78 **pocket**. Using isothermal titration calorimetry (ITC) with in-house software that models two  
79 interdependent binding sites, we demonstrated that two preQ<sub>1</sub> effectors bind with positive  
80 cooperativity. **Mutants at each effector site reduce binding affinity and raise the concentration of**  
81 **preQ<sub>1</sub> required for gene repression in a bacterial reporter assay.** ~~Unexpectedly, the *Can* preQ<sub>1</sub>-I<sub>I</sub>~~  
82 ~~riboswitch showed an extended effector sensing range that is more akin to a dimmer switch~~  
83 ~~than a digital switch.~~ We also found that additional preQ<sub>1</sub>-I<sub>I</sub> sequences from *Haemophilus*  
84 *influenzae* (*Hin*) and *Neisseria gonorrhoeae* (*Ngo*) sense two preQ<sub>1</sub> effectors with positive  
85 cooperativity, suggesting that tandem, stacked effector binding is a hallmark of all preQ<sub>1</sub>-I<sub>I</sub>  
86 riboswitches. Use of a single binding pocket to recognize two effectors has implications for the  
87 development of new antimicrobials that utilize a chemical scaffold that avoids cross-reactivity  
88 with naturally occurring metabolites.

89

## 90 **Results**

### 91 ***Features of the Can Riboswitch Fold***

92 To identify a suitable preQ<sub>1</sub>-I<sub>I</sub> riboswitch for structural and functional analysis, we  
93 searched previously curated type I sequences<sup>28</sup> (**Fig. 1b** and **Supplementary Fig. 1a**) for a  
94 strong SDS (5'-AGGAG-3') to use in a bacterial reporter assay<sup>13</sup>. We found several candidates,  
95 such as that from *Paenibacillus terrae*, but NCBI BLAST searches led to the discovery of an  
96 unreported sequence from *Can*<sup>29</sup>. This riboswitch crystallized readily from low salt solutions and  
97 the preQ<sub>1</sub>-bound co-crystal structure was determined by molecular replacement. The structure  
98 was refined to 2.60 Å-resolution yielding  $R_{\text{work}}/R_{\text{free}}$  values of 0.23/0.27 with acceptable quality-  
99 control metrics (**Supplementary Table 1**). Three crystallographically independent molecules  
100 were built, which showed varied quality in electron-density maps. Chains A and B are well  
101 defined, but the chain C P1-L3 junction shows a break (**Supplementary Fig. 2a**). Importantly,  
102 both effectors and the core aptamer are well-resolved in each chain (**Supplementary Fig. 2b**),  
103 providing a firm foundation to guide functional experiments.

104 The overall fold of the *Can* preQ<sub>1</sub>-I<sub>I</sub> riboswitch is an H-type pseudoknot (**Fig. 1c,d**). P1 is  
105 a canonical A-form helix whose minor groove is recognized by six A-amino-kissing interactions  
106 donated by the A-rich patch in L3 (**Supplementary Fig. 3**). This stabilizing segment culminates  
107 with a A28•G5-C18•A29 base-triple variation that forms the binding pocket floor and is  
108 reminiscent of preQ<sub>1</sub>-I<sub>II</sub> riboswitch structures from *Thermoanaerobacter tengcongensis* (*Tte*)<sup>16, 18,</sup>  
109 <sup>22</sup> and *Bacillus subtilis* (*Bsu*)<sup>15, 17</sup> (**Fig. 1e**). The pocket ceiling comprises an C8•A12•U32 base  
110 triple derived entirely from P2 (**Fig. 1f**). This configuration contrasts with preQ<sub>1</sub>-I<sub>II</sub> riboswitches,  
111 in which the ceiling is formed by bases from both P2 and the L2 loop<sup>16, 17, 23</sup>. The preference for  
112 C8 and U32 in preQ<sub>1</sub>-I<sub>I</sub> riboswitches appears to be incompatible with the base quadruple ceiling  
113 observed in preQ<sub>1</sub>-I<sub>II</sub> riboswitches that require an adenine immediately before the cytosine  
114 specificity base (**Fig. 1b & Supplementary Figs. 1a,b**).

115 P2 also contains the expression platform, wherein the Watson-Crick (WC) face of A33 of  
116 the SDS pairs non-canonically with G9 and the 2'-hydroxyl interacts with the WC face of A11  
117 (**Fig. 1f**). These SDS-anti(a)SDS interactions presumably attenuate translation. Although we

118 hypothesize that SDS G34 makes a WC pair with C10, the former is involved in a crystal contact  
119 (**Supplementary Fig. 2c**). Notably, the *Tte* preQ<sub>1</sub>-I<sub>II</sub> riboswitch forms the expected aSDS-SDS  
120 C-G intramolecular WC pair and exhibits non-canonical pairing in its expression platform<sup>16, 18, 22</sup>,  
121 as observed here for the *Can* preQ<sub>1</sub>-I<sub>I</sub> riboswitch.

122

### 123 **Stacked Metabolites in a Small Aptamer**

124 A distinguishing feature of our structure is two preQ<sub>1</sub> molecules, which we term  $\alpha$  and  $\beta$ ,  
125 stacked in a single aptamer pocket (**Fig. 2a**). Recognition at the  $\alpha$  site is conserved among  
126 preQ<sub>1</sub>-I<sub>I</sub> and preQ<sub>1</sub>-I<sub>II</sub> riboswitches, wherein specificity is conferred by a cytidine that recognizes  
127 preQ<sub>1</sub> by a *cis* WC interaction. Other conserved  $\alpha$ -site contributions include the WC face of A30,  
128 the major-groove edge of U6 and the major-groove edge of G5, which interacts with the preQ<sub>1</sub>  
129 methylamine (**Fig. 2b & Supplementary Figs. 4a-c**). In contrast, the  $\beta$  site has not been  
130 observed previously. Bases C31 and U7, which are highly conserved among type I sequences,  
131 confer specificity for preQ<sub>1</sub> by contributing three hydrogen bonds that recognize the metabolite  
132 edge (**Fig. 2c & Supplementary Fig. 1a**). The  $\beta$ -site preQ<sub>1</sub> interacts with the  $\alpha$ -site effector  
133 through aromatic stacking and donation of a hydrogen bond from the methylamine to both the  
134 keto oxygen of the  $\alpha$ -site effector and O4 of U16 (**Figs. 2a,c**). The mode of  $\beta$ -site effector  
135 recognition differs from all known preQ<sub>1</sub> riboswitches, including preQ<sub>1</sub>-I<sub>I</sub><sup>37</sup> and preQ<sub>1</sub>-I<sub>III</sub><sup>38</sup>, which  
136 utilize *trans* WC-pairing to read the preQ<sub>1</sub> face (**Supplementary Figs. 4d,e**). Although other  
137 riboswitches bind two effectors, these examples involve distinct **binding pockets** that spatially  
138 separate the ligands<sup>34-36, 39</sup>. To our knowledge, recognition of two interacting ligands in a single  
139 aptamer **pocket** is unprecedented in RNA biology.

140

### 141 **Stacked Recognition is Cooperative**

142 Interacting ligands should cooperatively influence each other's binding. Analysis of the  
143 *Can* riboswitch by ITC at 25 °C showed that the wildtype (WT) sequence binds preQ<sub>1</sub> with an  
144 average macroscopic  $K_D$  of  $32.0 \pm 2.0$  nM and a ligand-to-receptor ratio (N) of 1.8 (Fig. 2d &  
145 Supplementary Table 2). Fitting to a single-phase isotherm supports binding with positive  
146 cooperativity, in accord with our structure. Enthalpy drives binding and offsets the predicted  
147 entropic cost of ordering two ligands, producing a favorable  $\Delta G^\circ$  (Supplementary Table 2).  
148 Analysis at 37 °C to accentuate cooperative binding produced a parabolic thermogram best  
149 described by a binding model wherein two interdependent ligands occupy non-equivalent sites  
150 (Supplementary Figs. 5a,b). We implemented this model to assess the macroscopic binding  
151 constant of each interaction, which yielded  $K_{D1}$  of 891 nM and  $K_{D2}$  of 461 nM for the first and  
152 second binding events. The improved affinity observed for the second preQ<sub>1</sub> relative to the first  
153 indicates positive cooperativity, exemplified by the macroscopic cooperativity constant,  $\gamma$ , of 7.7  
154 (Supplementary Table 3).

155 We next generated *Can* riboswitch mutants to probe recognition at the  $\alpha$  and  $\beta$  sites.  
156 Position 17 is a major determinant of  $\alpha$ -site specificity (Fig. 2a,b) and the C17U mutation  
157 severely weakened binding as indicated by macroscopic  $K_{D1}$  and  $K_{D2}$  values of 3.13  $\mu$ M and  
158 1.30  $\mu$ M (Supplementary Fig. 5c & Supplementary Table 3). This result is consistent with the  
159 position of C17 in our structure and an equivalent nucleobase in the *Bsu* preQ<sub>1</sub>-I<sub>1</sub> aptamer<sup>23</sup>.  
160 C17U showed a parabolic isotherm suggesting retention of two binding events. Likewise,  
161 position 31 shows a prominent role in  $\beta$ -site specificity (Fig. 2a,c). The C31U mutation produced  
162 a comparable parabolic isotherm, corresponding to  $K_{D1}$  and  $K_{D2}$  values of 6.64  $\mu$ M and 10.26  $\mu$ M  
163 (Supplementary Fig. 5d & Supplementary Table 3). As expected from the structure, C31U  
164 severely affects  $\beta$ -site recognition. Both C17U and C31U retain positive cooperativity with  $\gamma$   
165 values of 9.6 and 2.6 (Supplementary Table 3).

166

167 **Dual-Binding Signatures in Other PreQ<sub>1</sub>-I<sub>1</sub> Riboswitches**

168 C17 and C31 are highly conserved in the type I consensus model (**Fig. 1b &**  
169 **Supplementary Fig. 1a**) and the importance of each is confirmed by our structure and ITC  
170 experiments. We next asked if dual binding is evident in other type I riboswitches. We used ITC  
171 at 25 °C to evaluate sequences from *Hin* and *Ngo*, **which belong to the Proteobacteria phyla**  
172 **rather than the Firmicutes (Supplementary Fig. 1a)**. The *Hin* riboswitch binds preQ<sub>1</sub> with a  $K_D$   
173 of  $52.9 \pm 0.2$  nM whereas the *Ngo* riboswitch binds with a  $K_D$  of  $50.5 \pm 1.3$  nM; like WT *Can*,  
174 each binds with an N of ~2 (**Supplementary Table 2 & Supplementary Figs. 5e,f**). Analysis at  
175 37 °C accentuates the cooperative character of isotherms (**Supplementary Figs. 5g, h**),  
176 resulting in  $\gamma$  values of 26.7 and 32.9 that indicate substantial positive cooperativity for each  
177 (**Supplementary Table 3**). We note a high degree of sequence identity exists in the binding  
178 pocket of the *Can*, *Hin* and *Ngo* riboswitches (**Supplementary Fig. 1a**). **Significantly, each**  
179 **possesses key nucleobases required for  $\alpha$  and  $\beta$  site preQ<sub>1</sub> recognition including U6, U7, U16,**  
180 **C17, A30 and C31 (Supplementary Fig. 6). Given ITC evidence of cooperativity for all three**  
181 **riboswitches, it appears that each riboswitch uses a similar mode of dual, stacked preQ<sub>1</sub>**  
182 **recognition.**

183

### 184 **Gene Regulation Requires Two Effectors**

185 Using a GFP<sub>uv</sub> reporter gene<sup>13, 40</sup> controlled by the *Can* riboswitch in live cells, we asked  
186 whether both preQ<sub>1</sub> molecules were required for effective gene regulation (**Fig. 3a**). We  
187 hypothesized that when both sites are occupied the SDS would be less accessible, leading to  
188 greater repression of GFP<sub>uv</sub> translation (**Fig. 3b**); likewise, intermediate levels of translation  
189 would occur if one site is occupied. Dose-response analysis of the WT riboswitch produced a  
190 biphasic curve with EC<sub>50</sub> values of **96 ± 14** nM (EC<sub>50, 1</sub>) and **7100 ± 360** nM (EC<sub>50, 2</sub>) (**Fig. 3c &**  
191 **Supplementary Table 4**). Collectively, both binding events confer 15.4-fold repression,  
192 comparable to the 14.9-fold repression observed for the *Lactobacillus rhamnosus* (*Lrh*) preQ<sub>1</sub>-II  
193 riboswitch<sup>37</sup>, which binds a single ligand **with an EC<sub>50</sub> of 15 nM**<sup>13</sup> (**Figs. 3c, inset, 3d &**

194 **Supplementary Table 4**). Notably, the *Can* riboswitch sensing range is broader than the *Lrh*  
195 riboswitch **in this assay, suggesting that it detects preQ<sub>1</sub> over a wider range of effector**  
196 **concentrations. At present, the basis for this apparent sensing difference is uncertain (see**  
197 **below)**. To ensure that the changes in GFP<sub>uv</sub> expression were riboswitch driven, we evaluated  
198 a positive control containing an SDS without an upstream riboswitch and a negative control  
199 lacking the SDS<sup>13</sup>. As expected, neither control responded to changes in preQ<sub>1</sub> concentration  
200 **(Fig. 3c,e). In accord with ITC data, C17U and C31U mutants each showed poorer EC<sub>50</sub> values**  
201 **that were ~60-fold higher and ~210-fold higher than WT (Figs. 3c-e & Supplementary Table**  
202 **4). While each mutant retains dual binding *in vitro*, the elevated EC<sub>50</sub> values imply that preQ<sub>1</sub>**  
203 **levels must be significantly higher inside cells to elicit an efficient gene-regulatory response,**  
204 **underscoring the importance of each effector binding site for gene regulation.**

205 **Although our data cannot differentiate a preferred order of preQ<sub>1</sub> binding, impairment of**  
206 **the β site had a more pronounced effect on gene regulation (Figs. 3d,e). While C17U elicited a**  
207 **6-fold repression, the C31U variant repressed GFP<sub>uv</sub> expression by only 2-fold (Figs. 3d,e).**  
208 **This functional disparity — also reflected by poorer C31U K<sub>D1</sub> and K<sub>D2</sub> values (Supplementary**  
209 **Table 3) — could be due to the requirement of the β effector to serve as a scaffold that supports**  
210 **the binding pocket ceiling via stacking (Fig. 1f). In this manner, the β site orders P2 in the gene**  
211 **off state while binding at the α site either orders the β site pocket or stabilizes effector binding at**  
212 **the β site.**

213

## 214 Discussion

215 We described the structure and cooperative binding of a small riboswitch that senses  
216 two stacked effectors **in a single binding pocket. Examination of all known preQ<sub>1</sub>-I sequences**  
217 **encompassing multiple phyla revealed that nucleobases that compose the α and β binding sites**  
218 **are conserved only within preQ<sub>1</sub>-I sequences (Supplementary Fig. 1a). In contrast, only**

219 nucleobases associated with  $\alpha$  site recognition are conserved within preQ<sub>1</sub>-I<sub>II</sub> sequences  
220 consistent with known *Tte* and *Bsu* riboswitches structures (Supplementary Figs. 1b, 4b,c & 6)  
221 and previous bioinformatic analysis<sup>38</sup>. Although experimental analysis of the preQ<sub>1</sub>-I<sub>III</sub> riboswitch  
222 is sparse, it appears that nucleobases associated with  $\alpha$  site recognition are conserved in  
223 preQ<sub>1</sub>-I<sub>II</sub> representatives, but not those associated with  $\beta$  site recognition (Supplementary Fig  
224 1c). This is consistent with previous ITC experiments, which demonstrated that this riboswitch  
225 binds with a 1:1 stoichiometry<sup>41</sup> — like preQ<sub>1</sub>-I<sub>II</sub> representatives. Accordingly, the unprecedented  
226 mode of dual effector recognition appears to be a hallmark of the most common and  
227 taxonomically diverse preQ<sub>1</sub> riboswitch group<sup>30-36</sup>, the preQ<sub>1</sub>-I<sub>I</sub> riboswitch, which has been  
228 overlooked until now.

229 Cooperative riboswitches are posited to show a steep “digital” dose-response<sup>2, 42, 43</sup>, yet  
230 the *Can* riboswitch exhibits a broad, biphasic dose-response in our in-cell GFP<sub>uv</sub> assay despite  
231 the positive cooperativity we observe in our ITC analysis (Supplementary Table 3). Although it  
232 is tempting to associate each transition in our GFP<sub>uv</sub> assay with an individual preQ<sub>1</sub> binding  
233 event, the intracellular concentration of preQ<sub>1</sub> is not known in such assays and depends on  
234 multiple factors, such as the efficacy of 7-deazapurine transporters<sup>44,45</sup>. Additionally, we cannot  
235 rule out possible competition between preQ<sub>1</sub> and other metabolites in the cellular milieu<sup>46</sup>, as  
236 observed for the *glmS* riboswitch<sup>47</sup>. These, or other factors, likely influence the shape of the *Can*  
237 riboswitch dose-response curve (Fig. 3c); nevertheless, the preQ<sub>1</sub>-I<sub>I</sub> riboswitch is expected to  
238 maintain positive cooperativity inside the cell<sup>46</sup>.

239 Our data allow us to conclude that dual-effector recognition is critical for efficient gene  
240 regulation by preQ<sub>1</sub>-I<sub>I</sub> riboswitches — as indicated by the deleterious effects caused by specific  
241  $\alpha$  and  $\beta$  site mutants. However, we can only speculate on the reason why cooperativity evolved  
242 in preQ<sub>1</sub>-I<sub>I</sub> riboswitches but not in other types or classes of the preQ<sub>1</sub> riboswitch family. Our data  
243 suggest that the level of regulation attained is similar between the preQ<sub>1</sub>-I<sub>I</sub> *Can* riboswitch and

244 the preQ<sub>1</sub>-II *Lrh* riboswitch, despite differences in preQ<sub>1</sub> binding stoichiometry<sup>37, 48</sup> (Fig. 3d). This  
245 result suggests that these two disparate riboswitch folds evolved equally effective chemical  
246 networks to sense a common effector for gene regulation. Yet, cooperativity is expected to  
247 provide notable benefits in regulation efficiency. One such advantage is that gene expression is  
248 permitted when metabolite levels are low (Fig. 3b, middle panel), while assuring the ability to  
249 quickly attenuate expression before excess effector accrues in the cell<sup>46</sup>. This is reasonable  
250 considering that many preQ<sub>1</sub>-I riboswitches control the translation of transporters that salvage  
251 Q-precursor metabolites from the extracellular environment<sup>23, 28, 49</sup>.

252 Although the *Can* and *Lrh* riboswitches differ in terms of binding stoichiometry and  
253 overall fold, each positions its expression platform near the binding pocket. This organization  
254 raises the question of whether dual, stacked metabolite binding could be effective to regulate  
255 folds in which the aptamer is located distally from the expression platform. PreQ<sub>1</sub>-III  
256 riboswitches exemplify this organization, wherein the expression platform can be as far as 40 Å  
257 away from the aptamer<sup>38</sup>. Communication between the single-effector pocket and an orthogonal  
258 SDS-antiSDS helix is mediated by an A minor base that makes a T-shaped contact with the  
259 edge of preQ<sub>1</sub><sup>38</sup> (Supplementary Fig. 4e). The preQ<sub>1</sub>-II riboswitch uses a similar pocket<sup>37</sup> and  
260 the A-minor base was shown to be essential for gene-regulatory function<sup>40</sup>. It is conceivable that  
261 dual, stacked effector recognition could be used by the preQ<sub>1</sub>-III riboswitch fold, if the effectors  
262 promoted coaxial helical stacking, and one or both were detected by an A-minor motif.  
263 Accordingly, we predict that additional riboswitches that bind dual, stacked effectors exist in  
264 nature.

265 Extant riboswitches can also provide clues about the organization of extinct ribozymes<sup>1</sup>.  
266 Riboswitches that utilize distal binding domains to accommodate a single ligand suggest how  
267 the folds of early ribozymes were organized to position substrates<sup>1</sup>. Our findings extend this  
268 concept to single-domain ribozymes. In particular, the *Can* aptamer shows how a ribozyme  
269 could position two substrates in one pocket to promote covalent bond formation. Intriguingly, the



270  $\alpha$ -site primary amine is solvent accessible ([Supplementary Fig. 7](#)), providing a key functional  
271 group absent from the RNA chemical repertoire<sup>50</sup>; in contrast, the  $\beta$ -preQ<sub>1</sub> WC face is solvent  
272 accessible. Notably, O6-methyl preQ<sub>1</sub> shows site-specific preQ<sub>1</sub>-I<sub>II</sub> riboswitch methylation<sup>51</sup>,  
273 providing a precedent for ligand-mediated chemical transformation of RNA. These observations  
274 collectively suggest how a ribozyme could position two substrates within a single compact fold  
275 to facilitate chemistries required for prebiotic metabolism.

276 PreQ<sub>1</sub>-I<sub>II</sub> riboswitches are prominent in human pathogens<sup>23, 28</sup> including *Ngo*, an urgent  
277 public-health threat<sup>52</sup>. The mode of effector recognition by the preQ<sub>1</sub>-I<sub>II</sub> riboswitch provides new  
278 opportunities to target such regulatory RNAs. For example, a single small molecule that  
279 simultaneously occupies both  $\alpha$  and  $\beta$  binding sites could reduce cross-reactivity with targets  
280 that recognize preQ<sub>1</sub>-like molecules (e.g., guanine), yielding greater potency and reduced  
281 toxicity. Our results suggest that such riboswitches merit further exploration for their potential as  
282 antimicrobial targets.

283

## 284 **MATERIALS AND METHODS**

285

### 286 **Data reporting**

287 No statistical methods were used to predetermine sample size. The experiments were not  
288 randomized and the investigators were not blinded to allocation during experiments and outcome  
289 assessment.

290

### 291 **RNA Purification**

292 RNA strands were synthesized by Dharmacon (Lafayette, CO) as described by the  
293 manufacturer except that deprotection heating was 30 min at 65 °C. RNA was purified by 15%  
294 denaturing PAGE and DEAE chromatography<sup>53</sup>. DEAE buffer was replaced with 0.02 M Na-  
295 HEPES pH 6.8, 0.10 M ammonium acetate, and 0.002 M EDTA; care was taken to minimize UV

296 exposure<sup>54</sup>. After ethanol precipitation of pooled DEAE fractions, RNA was dissolved in  
297 Nanopure™ UV/UF (ThermoFisher) water and desalted on a PD-10 column (GE Healthcare).  
298 Quality was assessed by analytical PAGE stained with SYBR Gold (Thermo-Fisher) and  
299 visualized on a GelDoc (BioRad XR+). Yield was measured spectrophotometrically. Lyophilized  
300 RNA was stored at -20 °C.

301

## 302 **Structure Determination**

303 Lyophilized RNA was dissolved in 20 µL of 0.01 M sodium cacodylate pH 7.0 and  
304 concentrated to 800 µM by centrifugation. Separate volumes of the concentrated riboswitch and  
305 an equal volume of folding buffer (0.004 M MgCl<sub>2</sub>, 0.01 mM sodium cacodylate pH 7.0 and  
306 0.0016 M preQ<sub>1</sub>) were heated at 65 °C for 3 min. The folding mix was added dropwise to the  
307 RNA and heated 3 min at 65 °C, followed by slow cooling to 24 °C.

308 Crystals were grown from VDX plates (Hampton Research) by hanging-drop vapor-  
309 diffusion. A 1 µL volume of RNA was combined with 1 µL of precipitant drawn from 1 mL in the  
310 well. Crystals grew from solutions of 30% (v/v) 2-methyl-2,4-pentanediol, 0.08 M KCl, 0.012 M  
311 NaCl, 0.04 M sodium cacodylate pH 5.5, and 0.002 M hexammine cobalt (III) chloride. Crystals  
312 grew in 3 weeks at 20 °C as hexagonal rods of size 0.125 mm × 0.040 mm × 0.040 mm.

313 Crystals were cryo-protected by 2 min transfers into well solution supplemented with 40% to  
314 60% (v/v) 2-methyl-2,4-pentanediol. Single rods were captured in nylon loops using 16 mm  
315 copper pins (Hampton Research) with the *c*\*-axis oriented parallel to the  $\phi$  axis. Crystals were  
316 plunged into N<sub>2</sub>(l) for shipping to the Stanford Synchrotron Radiation Lightsource (SSRL).

317 X-ray data were collected remotely on beamline 12-2 using Blu-Ice software and the  
318 Stanford Auto-Mounter<sup>55-57</sup> at a  $\lambda$  of 0.9800 Å with a  $\Delta\phi$  of 0.15°, an exposure time of 0.7 s per  
319 image with 450 total images, and a sample-to-detector distance of 425 mm at 100 K. All data  
320 were recorded on a PILATUS 6M detector (Dectris Inc). Data-collection strategies were  
321 generated using Web-Ice<sup>55</sup>. Diffraction data were reduced with autoxds<sup>58</sup> using XDS,

322 POINTLESS, AIMLESS and TRUNCATE<sup>59-61</sup>. The structure was determined by molecular  
323 replacement in PHENIX<sup>61</sup> starting from the *B. subtilis* preQ<sub>1</sub>-I riboswitch (Protein Data Bank  
324 entry 3FU2). The top solution for three molecules in the asymmetric unit produced a TFZ of 9.2  
325 and a log-likelihood gain of 289. The structure was built in COOT with additional refinement in  
326 PHENIX<sup>61</sup>. Intensity and refinement statistics are in [Supplementary Table 1](#). Cartoons,  
327 schematic diagrams and surfaces of coordinates were generated in PyMOL (Schrödinger LLC).  
328 In [Supplementary Fig. 7](#), preQ<sub>1</sub> atoms were colored by solvent accessible surface area using  
329 the color area (solvent) function in PyMOL (Schrödinger LLC). Reported solvent accessible  
330 surface area were calculated in PISA<sup>62</sup> (PDBE PISA v1.52) for chain A.

331

### 332 **Isothermal Titration Calorimetry**

333 Each sample was folded by dissolving lyophilized RNA in 250  $\mu$ L 0.01 M sodium  
334 cacodylate pH 7.0. RNA was heated to 65 °C for 3 min and mixed with an equal volume of  
335 preheated folding buffer at 65 °C comprising 0.01 M sodium cacodylate pH 7.0 and 0.004 M  
336 MgCl<sub>2</sub>. The combined solution was heated for an additional 3 min, then slow cooled to 24 °C  
337 followed by overnight dialysis against 2 L of ITC buffer (0.050 M Na-HEPES pH 7.0, 0.10 M NaCl  
338 and 0.004 M MgCl<sub>2</sub>) using a 3,500 MWCO Slide-A-Lyzer Dialysis Cassette G2 (Thermo-  
339 Scientific). PreQ<sub>1</sub> from a 0.020 M stock in water was diluted to 0.0010 M in ITC buffer.

340 ITC was conducted using two different instruments. Experiments with WT *Can*, *Ngo* and  
341 *Hin* riboswitches at 25 °C were conducted on a PEAQ-ITC (Malvern) with RNA in the cell and  
342 preQ<sub>1</sub> in the syringe over 19 injections. Experiments were carried out with an injection volume of  
343 4  $\mu$ L (0.5  $\mu$ L technical injection) and a spacing of 150 s. These thermograms were analyzed with  
344 MicroCal PEAQ-ITC Analysis software (Malvern Panalytical, Inc) using a 'single-sites' binding  
345 model, which corresponds to the independent sites model below.

346 To obtain additional data points for cooperativity analysis, WT experiments were also  
347 conducted at 37 °C on a VP-ITC (MicroCal). Experiments were carried out with an injection

348 volume of 10  $\mu\text{L}$  (6  $\mu\text{L}$  technical injection) and a spacing of 240 s with RNA in the cell and preQ<sub>1</sub>  
349 in the syringe over 29 injections. Mutant riboswitches were analyzed similarly but at 25 °C due to  
350 poor binding. These thermograms were analyzed using a ‘two-interdependent non-equivalent  
351 sites’ model ([Supplementary Fig. 5b](#)) and described below.

352 In each case, at least two measurements were performed for each RNA sample on the  
353 appropriate instrument. Representative thermograms and curve fits are provided in  
354 [Supplementary Fig. 5](#). Thermodynamic parameters for experiments performed on the PEAQ ITC  
355 are in [Supplementary Table 2](#) and experiments on the VP-ITC in [Supplementary Table 3](#).  
356 Macroscopic  $\Delta G^\circ$  values for mutant riboswitches represent the sum of microscopic  $\Delta G^\circ$  values,  
357 which were obtained by calculating  $K_{\text{rel}}$  at each binding event versus the WT riboswitch at 25 °C.  
358 The concentrations of RNA and preQ<sub>1</sub> used in ITC experiments are reported in [the source data](#)  
359 [file](#).

360

### 361 **Least-squares regression analysis of ITC experiments (Two Interdependent Non-** 362 **Equivalent Sites Model)**

363 ITC experiments performed on the VP instrument produced parabolic thermograms  
364 indicative of cooperativity but these could not be satisfactorily fit with conventional ITC software  
365 as noted<sup>39</sup>. Structural evidence indicates that the preQ<sub>1</sub> ligands interact in their respective binding  
366 pockets, suggesting that a cooperative binding model in which the two effector-binding sites are  
367 non-equivalent and interdependent was appropriate. We implemented this model  
368 ([Supplementary Fig. 5b](#)) in a custom Python program based on the binding polynomial theory<sup>63</sup>.

369 Rather than fitting an apparent stoichiometry, we fixed the number of binding sites to  
370 exactly two and fit a nuisance parameter that represents the effective concentration of active  
371 riboswitch RNA in the ITC cell relative to the recorded concentration<sup>63, 64</sup>. Although the binding  
372 model describes a binding enthalpy and a microscopic dissociation constant for each of four

373 distinct binding equilibria (**Supplementary Fig. 5b**), there are only three independent microscopic  
 374 dissociation constants:

$$375 \quad K_{D,A1} = \frac{[R][L]}{[RL_A]} \quad K_{D,B1} = \frac{[R][L]}{[RL_B]} \quad K_{D,A2} = \frac{[RL_B][L]}{[RL_{AB}]} \quad K_{D,B2} = \frac{[RL_A][L]}{[RL_{AB}]} \quad (1)$$

$$376 \quad K_{D,A1}K_{D,B2} = K_{D,B1}K_{D,A2} = \frac{[R][L]^2}{[RL_{AB}]} \quad (2)$$

377 Likewise, there are only three independent binding enthalpies because enthalpy is a state  
 378 function; completing a thermodynamic cycle must result in no enthalpy change.

$$379 \quad \Delta H^\circ_{A1} + \Delta H^\circ_{B2} - \Delta H^\circ_{A2} - \Delta H^\circ_{B1} = 0 \quad (3)$$

380 The binding polynomial results in a cubic equation in the concentration of free ligand  $[L]$

$$381 \quad [L]^3 + (2R_T - L_T + K_{D,A2} + K_{D,B2})[L]^2 \\ 382 \quad + \left( (R_T - L_T)(K_{D,A2} + K_{D,B2}) + K_{D,A1}K_{D,B2} \right) [L] - L_T K_{D,A1}K_{D,B2} = 0 \quad (4)$$

383 where  $R_T = [R] + [RL_A] + [RL_B] + [RL_{AB}]$  is the total concentration of RNA in the ITC cell and  
 384  $L_T = [L] + [RL_A] + [RL_B] + 2[RL_{AB}]$  is the total concentration of preQ<sub>1</sub> in the ITC cell. We solved  
 385 this cubic equation analytically by choosing the root that satisfies  $[L] = 0$  when  $L_T = 0$ .

386 Following a recent approach<sup>65</sup>, we explicitly accounted for the dilution of all chemical  
 387 species present due to displacement of the liquid in the ITC cell by the injection volume. The  
 388 differential changes in the concentrations of bound species due to a differential injected volume  
 389  $dV$  are

$$390 \quad d[RL_A] = \frac{1}{V_0} (-[RL_A]dV + d\Phi_{A1} - d\Phi_{B2}) \\ 391 \quad d[RL_B] = \frac{1}{V_0} (-[RL_B]dV + d\Phi_{B1} - d\Phi_{A2}) \quad (5) \\ 392 \quad d[RL_{AB}] = \frac{1}{V_0} (-[RL_{AB}]dV + d\Phi_{A2} + d\Phi_{B2})$$

393 where  $V_0$  is the volume of the ITC cell and  $\Phi_i$  is the flux through the binding equilibrium  $i$ . The  
 394 enthalpy can be expressed as a function of the total injected volume  $V$

395 
$$H(V) = \frac{1}{V_0} \left( \Delta H^\circ_{A1} \frac{d\Phi_{A1}}{dV} + \Delta H^\circ_{B1} \frac{d\Phi_{B1}}{dV} + \Delta H^\circ_{A2} \frac{d\Phi_{A2}}{dV} + \Delta H^\circ_{B2} \frac{d\Phi_{B2}}{dV} \right) \quad (6)$$

396 The enthalpy change associated with a particular injection that brings the stoichiometric  
 397 ratio of ligand to receptor  $S$  from  $S_{i-1}$  to  $S_i$  is given by the average value of the enthalpy over this  
 398 interval<sup>65</sup>.

399 
$$\Delta H_i = \frac{1}{S_i - S_{i-1}} \int_{S_{i-1}}^{S_i} dS H(S) \quad (7)$$

400 Inserting Eqs. 1–3 and Eqs. 5–6 into Eq. 7 and using integration by parts gives the injection  
 401 enthalpy change in terms of the fit parameters, the ITC cell volume, the initial concentrations of  
 402 RNA in the ITC cell  $R_0$  and of ligand in the syringe  $L_0$ , and the concentration of free ligand obtained  
 403 as the solution to Eq. 4.

404 
$$\Delta H_i = \frac{\Omega(S_i) - \Omega(S_{i-1})}{L_0(S_i - S_{i-1})}$$

405 
$$\Omega(S) = \frac{\left(\frac{L_0}{R_0} + S\right) (L_T - [L]) (\Delta H_{A1} K_{D,B2} + \Delta H_{B1} K_{D,A2} + (\Delta H_{A1} + \Delta H_{B2}) [L])}{K_{D,A2} + K_{D,B2} + 2[L]} \quad (8)$$

406 We used a trust region reflective algorithm<sup>66</sup> implemented in the `optimize.least_squares()`  
 407 method of SciPy<sup>67</sup> to minimize the following cost function:

408 
$$F(\vec{\theta}, \lambda) = \sum_{i=1}^N (\Delta H_i(\vec{\theta}) - \Delta H_{i,obs})^2 + \lambda \sum_{j=1}^M \left( \frac{\theta_j - \theta_{j,0}}{w_j} \right)^2 \quad (9)$$

409 where  $N$  is the number of observed injections and  $M$  is the number of fit parameters. The first  
 410 term is a least-squares term describing the goodness-of-fit between the estimated and observed  
 411 injection enthalpy changes. The second term is an L2 regularization term—whose relative  
 412 strength is controlled by the hyperparameter  $\lambda$ —that prevents overfitting by penalizing deviations  
 413 of the fit parameters  $\theta$  from a target value  $\theta_0$ . In a Bayesian framework, this penalty is interpreted  
 414 as a Gaussian prior on the fit parameters with mean  $\theta_0$  and standard deviation  $w$ <sup>68</sup>. For the three  
 415 independent microscopic dissociation constants, regularization was applied to the natural

416 logarithm of the dissociation constant. The regularization targets were set to the values of the fit  
417 parameters from a binding model assuming two independent and equivalent binding sites, i.e. the  
418 model used by most commercial ITC software. We derived analytical derivatives of the cost  
419 function given by Eq. 9 with respect to the fit parameters to take advantage of computationally  
420 efficient gradient-based optimization methods.

421 For each RNA sequence, we performed a global fit to obtain a single set of fit parameters  
422 informed by multiple experiments in which the initial concentrations of riboswitch receptor and  
423 ligand vary in order to interrogate different regions of the resulting thermogram. One offset  
424 parameter, a constant added to the estimated injection enthalpy changes, was fit for each  
425 experiment. The hyperparameter  $\lambda$  controlling the relative strength of the regularization term was  
426 optimized for each RNA sequence individually by cross validation across experiments. Each  
427 experiment was fit individually for a sequence of  $\lambda$  with logarithmic spacing— $\log_{10} \lambda$  was varied  
428 from  $-6$  to  $+6$  in steps of  $0.125$ . The resulting fit parameters were used to estimate the value of  
429 the cost function for the other experiments involving the same RNA sequence. The value of  $\lambda$  with  
430 the smallest average value of the cost function for experiments not used to train the parameters  
431 was chosen for the global fit.

432 Two sets of values were used for the regularization weights  $w$ . For *Can* WT, *Can* C31U  
433 and *Hin* WT, the regularization weights were  $16 k_B T$  for the binding enthalpies and  $\log 10$  for the  
434 logarithms of the dissociation constants, where  $k_B$  is the Boltzmann constant and  $T$  is the absolute  
435 temperature. However, these weights produced poor quality fits for *Can* C17U and *Ngo* WT, as  
436 revealed by fit parameters with large bootstrapped uncertainties. As such, the regularization  
437 weights for these sequences were  $16 k_B T$  for both the binding enthalpies and the logarithms of  
438 the dissociation constants. For all RNA sequences, the regularization weights were  $1 \text{ kcal mol}^{-1}$   
439 for the offsets and  $0.05$  for the nuisance parameter describing the effective RNA concentration.

440 To derive estimates and 95% confidence intervals for the fit parameters, we used a  
441 bootstrapping method to resample the fitting target in the nonlinear regression<sup>69</sup>. In each bootstrap  
442 iteration, we added the residual from the initial fit multiplied by a random number sampled from a  
443 standard normal distribution to the observed injection enthalpy changes. The resulting  
444 distributions of fit parameters are non-normal, and so we report the estimate of each fit parameter  
445 as the median of the bootstrap parameter distribution. We also report a 95% confidence interval  
446 as the (2.5, 97.5) percentiles of this bootstrap distribution.

447 In addition to the fit parameters, we also calculate the following derived parameters:  
448 cooperativity  $C$ , macroscopic dissociation constants  $K_{D,1}$  and  $K_{D,2}$ , and a macroscopic  
449 cooperativity  $\gamma$ .

$$450 \quad C = \frac{K_{D,A1}}{K_{D,A2}}$$
$$451 \quad K_{D,1} = \left( \frac{1}{K_{D,A1}} + \frac{1}{K_{D,B1}} \right)^{-1}$$
$$452 \quad K_{D,2} = K_{D,A2} + K_{D,B2}$$
$$453 \quad \gamma = \frac{4K_{D,1}}{K_{D,2}} \quad (10)$$

454 We obtained estimates and 95% confidence intervals for derived parameters by calculating the  
455 derived parameters for each bootstrap iteration and then reporting the median and (2.5, 97.5)  
456 percentile of the bootstrap parameter distribution.

457

### 458 **In-cell GFPuv reporter assay**

459 The WT *Can* riboswitch was placed into the pBR327-*Lrh*(WT)-GFPuv plasmid upstream  
460 of the GFPuv reporter gene (**Fig. 3a**). Riboswitch mutants were prepared by site-directed  
461 mutagenesis (GenScript Inc.) on the WT sequence, which were verified by DNA sequencing.



462 For experiments involving the *Lrh* riboswitch, the parent pBR327-*Lrh*(WT)-GFPuv plasmid was  
463 used<sup>13</sup>.

464 The assay was performed as described<sup>13, 40</sup> with some exceptions. *E. coli* strain JW2765  
465  $\Delta queF$  cells (Coli Genetic Stock Center, Yale University) — incapable of preQ<sub>1</sub> biosynthesis —  
466 were transformed with the desired plasmid and grown on CSB agar plates containing both  
467 ampicillin (100  $\mu\text{g mL}^{-1}$ ) and kanamycin (50  $\mu\text{g mL}^{-1}$ ). Single colonies were isolated to inoculate  
468 overnight liquid cultures of 3 mL CSB-amp-kan media. These were used to inoculate 2 mL of  
469 fresh CSB-amp-kan media with varying concentrations of preQ<sub>1</sub>: 0, 1 nM, 10 nM, 50 nM, 75 nM,  
470 100 nM, 250 nM, 500 nM, 750 nM, 1  $\mu\text{M}$ , 2.5  $\mu\text{M}$ , 5  $\mu\text{M}$ , 7.5  $\mu\text{M}$ , 10  $\mu\text{M}$ , 50  $\mu\text{M}$ , 100  $\mu\text{M}$ , 500  $\mu\text{M}$ ,  
471 1 mM, and 3 mM; the highest concentration corresponds to the solubility limit of preQ<sub>1</sub> in CSB<sup>13</sup>.  
472 Three or more biological replicates were measured for each concentration. All measurements  
473 and analysis were performed as described<sup>13</sup> using Prism (GraphPad Software, Inc). **The**  
474 **replicates in each construct were compared using the “compare datasets” function before**  
475 **analysis.** The WT *Can* curve showed a biphasic model whereas others were best described by  
476 a log(inhibitor) dose versus response (3 parameter).

477 An unpaired student's t-test with a Welch's correction was used to analyze fold  
478 repression data. The *p* value for WT *Can* vs WT *Lrh* was 0.6429 ( $t = 0.503$ , degrees of freedom  
479 ( $df = 3.76$ , 95% confidence interval = -4.515 to 6.453). The *p* value for WT *Can* vs C17U *Can*  
480 was 0.0125 ( $t = 5.94$ ,  $df = 2.72$ , 95% confidence interval = -15.47 to -4.266). The *p* value for WT  
481 *Can* vs C31U *Can* was 0.0112 ( $t = 9.23$ ,  $df = 2.02$ , 95% confidence interval = -20.61 to -7.583).  
482 The *p* value for WT *Can* vs the negative control was 0.0106 ( $t = 9.59$ ,  $df = 2.01$ , 95% confidence  
483 interval = -21.16 to -8.706). The *p* value for WT *Can* vs the positive control was 0.0103 ( $t = 9.71$ ,  
484  $df = 2.01$ , 95% confidence interval = -21.3400 to -8.2800).

485 Notably, fluorescence emission in the absence of preQ<sub>1</sub> is comparable between all  
486 riboswitch constructs and the positive control; moreover, the WT *Can* and *Lrh* sequences  
487 repress GFPuv fluorescence emission to a level comparable to the negative control —

488 demonstrating the rigor of the assay (**Supplementary Fig. 8**). An unpaired student's t-test with  
489 a Welch's correction was also used to analyze fluorescence emission data. The  $p$  value for WT  
490 *Can* was 0.0037 ( $t = 14.96$ ,  $df = 2.09$ , 95% confidence interval = -173452 to -98511). The  $p$   
491 value for C17U *Can* was 0.0175 ( $t = 6.64$ ,  $df = 2.18$ , 95% confidence interval = -212164 to -  
492 53149). The  $p$  value for C31U *Can* was 0.1263 ( $t = 2.05$ ,  $df = 3.22$ , 95% confidence interval = -  
493 107817 to -21313). The  $p$  value for WT *Lrh* was 0.0037 ( $t = 14.96$ , degrees of freedom ( $df$ ) =  
494 2.09, 95% confidence interval = -173452 to -98511). The  $p$  value for the positive control was  
495 0.7441 ( $t = 0.35$ ,  $df = 3.45$ , 95% confidence interval = -61691 to -48527). The  $p$  value for the  
496 negative control was 0.0631 ( $t = 2.60$ ,  $df = 3.80$ , 95% confidence interval = -11377 to 488.8).

497

#### 498 **DATA AVAILABILITY**

499 Structure factor amplitudes and coordinates for the *Can* preQ<sub>1</sub>-I<sub>1</sub> riboswitch were  
500 deposited in the Protein Data Bank. Publicly available PDB entries used in this study are: 6VUI,  
501 3FU2, 4RZD and 4JF2. Source data files are available in the Supplementary Data, which  
502 includes injection data for ITC, and fluorescence emission and cell growth readings for in-cell  
503 assays.

504

#### 505 **CODE AVAILABILITY**

506 The ITC fitting software and parameter fits are available on GitHub at  
507 [https://github.com/chapincavender/itc\\_two\\_site\\_fit](https://github.com/chapincavender/itc_two_site_fit), distributed under the MIT license.

508

509 **REFERENCES**

- 510 1. Nahvi, A. et al. Genetic control by a metabolite binding mRNA. *Chem Biol* **9**, 1043-1049  
511 (2002).
- 512 2. McCown, P. J. et al. Riboswitch diversity and distribution. *RNA* **7**, 995-1011 (2017).
- 513 3. Breaker, R. R. Riboswitches and Translation Control. *Cold Spring Harb. Perspect. Biol.*  
514 **10**, 1-14 (2018).
- 515 4. Suddala, K. C. et al. Single transcriptional and translational preQ1 riboswitches adopt  
516 similar pre-folded ensembles that follow distinct folding pathways into the same ligand-bound  
517 structure. *Nucleic Acids Res.* **41**, 10462-75 (2013).
- 518 5. Hua, B. et al. Real-time monitoring of single ZTP riboswitches reveals a complex and  
519 kinetically controlled decision landscape. *Nat. Commun* **11**, 4531-4531 (2020).
- 520 6. Stagno, J. R. et al. Structures of riboswitch RNA reaction states by mix-and-inject XFEL  
521 serial crystallography. *Nature* **541**, 242-246 (2017).
- 522 7. Frieda, K. L. & Block, S. M. Direct Observation of cotranscriptional folding in an adenine  
523 riboswitch. *Science* **338**, 397-400 (2012).
- 524 8. Babina, A. M., Lea, N. E., & Meyer, M. M. *In vivo* behavior of the tandem glycine  
525 riboswitch in *Bacillus subtilis*. *mBio* **8**, 5 (2017).
- 526 9. McCarty, R. M. & Bandarian, V. Biosynthesis of pyrrolopyrimidines. *Bioorg. Chem.* **43**,  
527 15-25 (2012).
- 528 10. Harada, F. & Nishimura, S. Possible anticodon sequences of tRNA<sup>His</sup>, tRNA<sup>Asn</sup>, and  
529 tRNA<sup>Asp</sup> from *Escherichia coli*. Universal presence of nucleoside O in the first position of the  
530 anticodons of these transfer ribonucleic acid. *Biochemistry* **11**, 301-308 (1972).
- 531 11. Noguchi, S., Nishimura, Y., Hirota, Y. & Nishimura, S. Isolation and characterization of  
532 an *Escherichia coli* mutant lacking tRNA-guanine transglycosylase. Function and biosynthesis of  
533 queuosine in tRNA. *J Biol. Chem.* **257**, 6544-50 (1982).
- 534 12. Tuorto, F. et al. Queuosine-modified tRNAs confer nutritional control of protein  
535 translation. *Embo J* **37**, e99777 (2018).
- 536 13. Dutta, D., Belashov, I. A. & Wedekind, J. E., Coupling green fluorescent protein  
537 expression with chemical modification to probe functionally relevant riboswitch conformations in  
538 live bacteria. *Biochemistry* **57**, 4620-4628 (2018).
- 539 14. Hurt, J. K., Olgen, S. & Garcia, G. A., Site-specific modification of *Shigella flexneri* virF  
540 mRNA by tRNA-guanine transglycosylase *in vitro*. *Nucleic Acids Res.* **35**, 4905-4913 (2007).
- 541 15. Kang, M.; Peterson, R. & Feigon, J. Structural Insights into riboswitch control of the  
542 biosynthesis of queuosine, a modified nucleotide found in the anticodon of tRNA. *Mol. Cell* **33**,  
543 784-90 (2009).

- 544 16. Spitale, R. C., Torelli, A. T., Krucinska, J., Bandarian, V. & Wedekind, J. E. The  
545 structural basis for recognition of the preQ<sub>0</sub> metabolite by an unusually small riboswitch aptamer  
546 domain. *J Biol. Chem.* **284**, 11012-11016 (2009).
- 547 17. Klein, D. J., Edwards, T. E. & Ferre-D'Amare, A. R., Cocrystal structure of a class I  
548 preQ<sub>1</sub> riboswitch reveals a pseudoknot recognizing an essential hypermodified nucleobase. *Nat.*  
549 *Struc. Mol Biol.* **16**, 343-344 (2009).
- 550 18. Schroeder, G. M. et al. Analysis of a preQ<sub>1</sub>-I riboswitch in effector-free and bound states  
551 reveals a metabolite-programmed nucleobase-stacking spine that controls gene regulation.  
552 *Nucleic Acids Res.* **48**, 8146-8164 (2020).
- 553 19. Rinaldi, A. J., Lund, P. E., Blanco, M. R. & Walter, N. G.. The Shine-Dalgarno  
554 sequence of riboswitch-regulated single mRNAs shows ligand-dependent accessibility bursts.  
555 *Nat Commun* **7**, 8976 (2016).
- 556 20. Banas, P., Sklenovsky, P., Wedekind, J. E., Sponer, J. & Otyepka, M., Molecular  
557 mechanism of preQ<sub>1</sub> riboswitch action: a molecular dynamics study. *J. Phys. Chem. B* **116**,  
558 12721-12734 (2012).
- 559 21. Rieder, U., Lang, K., Kreutz, C., Polacek, N. & Micura, R.. Evidence for pseudoknot  
560 formation of class I preQ<sub>1</sub> riboswitch aptamers. *Chembiochem* **10**, 1141-4 (2009).
- 561 22. Jenkins, J. L., Krucinska, J., McCarty, R. M., Bandarian, V. & Wedekind, J. E.,  
562 Comparison of a preQ<sub>1</sub> riboswitch aptamer in metabolite-bound and free states with implications  
563 for gene regulation. *J. Biol. Chem* **286**, 24626-37 (2011).
- 564 23. Roth, A. et al. A riboswitch selective for the queuosine precursor preQ<sub>1</sub> contains an  
565 unusually small aptamer domain. *Nat Struct Mol Biol* **14**, 308-17 (2007).
- 566 24. Suddala, K. C., Wang, J., Hou, Q. & Walter, N. G. Mg<sup>2+</sup> shifts ligand-mediated folding of  
567 a riboswitch from induced-fit to conformational selection. *J. Am. Chem. Soc.* **137**, 14075-14083  
568 (2015).
- 569 25. Connelly, C. M. et al. Synthetic ligands for PreQ<sub>1</sub> riboswitches provide structural and  
570 mechanistic insights into targeting RNA tertiary structure. *Nat. Commun.* **10**, 1501 (2019).
- 571 26. Neuner, E., Frener, M., Lusser, A. & Micura, R. Superior cellular activities of azido-  
572 over amino-functionalized ligands for engineered preQ<sub>1</sub> riboswitches in *E. coli*. *RNA Biol* **15**,  
573 1376-1383 (2018).
- 574 27. Eichhorn, C. D., Kang, M. & Feigon, J., Structure and function of preQ<sub>1</sub> riboswitches.  
575 *Biochim. Biophys. Acta* **1839**, 939-950 (2014).
- 576 28. McCown, P. J., Liang, J. J., Weinberg, Z. & Breaker, R. R. Structural, functional, and  
577 taxonomic diversity of three preQ<sub>1</sub> riboswitch classes. *Chem Biol* **21**, 880-889 (2014).
- 578 29. Zhu, S et al. Complete genome sequence of hemolysin-containing *Carnobacterium* sp.  
579 strain CP1 isolated from the antarctic. *Genome Announc.* **4**, e00690-16 (2016).

- 580 30. Leontis, N. B. & Westhof, E., Geometric nomenclature and classification of RNA base  
581 pairs. *RNA* **7**, 499-512 (2001).
- 582 31. Ren, A. & Patel, D. J. c-di-AMP binds the ydaO riboswitch in two pseudo-symmetry-  
583 related pockets. *Nat. Chem. Biol.* **10**, 780-786 (2014).
- 584 32. Jones, C. P. & Ferre-D'Amare, A. R. Crystal structure of a c-di-AMP riboswitch reveals  
585 an internally pseudo-dimeric RNA. *EMBO J.* **33**, 2692-703 (2014).
- 586 33. Reiss, C. W. & Strobel, S. A., Structural basis for ligand binding to the guanidine-II  
587 riboswitch. *RNA* **23**, 1338-1343 (2017).
- 588 34. Trausch, J. J., Ceres, P., Reyes, F. E. & Batey, Robert T., The structure of a  
589 tetrahydrofolate-sensing riboswitch reveals two ligand binding sites in a single aptamer.  
590 *Structure* **19**, 1413-1423 (2011).
- 591 35. Huang, L., Wang, J. & Lilley, D. M. J. The structure of the guanidine-II riboswitch. *Cell*  
592 *Chem. Biol.* **24**, 695-702.e2 (2017).
- 593 36. Gao, A. & Serganov, A. Structural insights into recognition of c-di-AMP by the ydaO  
594 riboswitch. *Nat. Chem. Biol.* **10**, 787-792 (2014).
- 595 37. Liberman, J. A., Salim, M., Krucinska, J. & Wedekind, J. E. Structure of a class II preQ<sub>1</sub>  
596 riboswitch reveals ligand recognition by a new fold. *Nat. Chem. Biol.* **9**, 353-355 (2013).
- 597 38. Liberman, J. A. et al. Structural analysis of a class III preQ<sub>1</sub> riboswitch reveals an  
598 aptamer distant from a ribosome-binding site regulated by fast dynamics. *Proc. Natl. Acad. Sci.*  
599 *U. S. A.* **112**, E3485-94 (2015).
- 600 39. Huang, L., Serganov, A. & Patel, D. J. Structural insights into ligand recognition by a  
601 sensing domain of the cooperative glycine riboswitch. *Mol. Cell.* **40**, 774-786 (2010).
- 602 40. Dutta, D. & Wedekind, J. E., Nucleobase mutants of a bacterial preQ<sub>1</sub>-II riboswitch that  
603 uncouple metabolite sensing from gene regulation. *J. Biol. Chem.* **295**, 2555-2567 (2020).
- 604 41. Liberman, J. A., Bogue, J. T., Jenkins, J. L., Salim, M. & Wedekind, J. E. ITC analysis  
605 of ligand binding to preQ<sub>1</sub> riboswitches. *Meth. Enzymol.* **549**, 435-50 (2014).
- 606 42. Sudarsan, N. et al. Tandem riboswitch architectures exhibit complex gene control  
607 functions. *Science* **314**, 300-304 (2006).
- 608 43. Jones, C. P. & Ferre-D'Amare, A. R. Long-range interactions in riboswitch control of  
609 gene expression. *Annu. Rev. Biophys.* **46**, 455-481 (2017).
- 610 44. Zallot, R., Yuan, Y. & de Crecy-Lagard, V. The *Escherichia coli* COG1738 member  
611 YhhQ is involved in 7-Cyanodeazaguanine preQ<sub>0</sub> transport. *Biomolecules* **7**, 1-13 (2017).
- 612 45. Yuan, Y. et al. Discovery of novel bacterial queuine salvage enzymes and pathways in  
613 human pathogens. *Proc. Natl. Acad. Sci. U. S. A.* **116**, 19126-19135 (2019).
- 614 46. Breaker, R. R., Riboswitches and the RNA world. *Cold Spring Harb. Perspect. Biol.* **4**,  
615 a003566 (2012).

- 616 47. Watson, P. Y. & Fedor, M. J. The *glmS* riboswitch integrates signals from activating and  
617 inhibitory metabolites *in vivo*. *Nat. Struct. Mol. Biol.* **18**, 359-363 (2011).
- 618 48. Kang, M., Eichhorn, C. D. & Feigon, J. Structural determinants for ligand capture by a  
619 class II preQ<sub>1</sub> riboswitch. *Proc. Natl. Acad. Sci. U. S. A.* **111**, E663-E671 (2014).
- 620 49. Rodionov, D. A. et al. A novel class of modular transporters for vitamins in prokaryotes. *J*  
621 *Bacteriol.* **191**, 42-51 (2009).
- 622 50. Wilson, T. J. & Lilley, D. M. J., The potential versatility of RNA catalysis. *Wiley*  
623 *Interdiscip. Rev. RNA.* **12**, e1651 (2021).
- 624 51. Flemmich, L., Heel, S., Moreno, S., Breuker, K. & Micura, R. A natural riboswitch  
625 scaffold with self-methylation activity. *Nat. Commun.* **12**, 3877 (2021).
- 626 52. CDC Biggest Threats and Data: 2019 Antibiotic Resistance Threats Report.  
627 <https://www.cdc.gov/drugresistance/biggest-threats.html>.
- 628 53. Lippa, G. M. et al. Crystallographic analysis of small ribozymes and riboswitches.  
629 *Methods Mol Biol* **848**, 159-84 (2012).
- 630 54. Kladwang, W., Hum, J. & Das, R. Ultraviolet shadowing of RNA can cause significant  
631 chemical damage in seconds. *Sci Rep* **2**, 517 (2012).
- 632 55. Gonzalez, A. et al. Web-Ice: integrated data collection and analysis for macromolecular  
633 crystallography. *J.App. Crystall.* **41**, 176-184 (2008).
- 634 56. Soltis, S. M. et al. New paradigm for macromolecular crystallography experiments at  
635 SSRL: automated crystal screening and remote data collection. *Acta Crystallogr D Biol*  
636 *Crystallogr* **64**, 1210-21 (2008).
- 637 57. McPhillips, T. M. et al. Blu-Ice and the distributed control system: software for data  
638 acquisition and instrument control at macromolecular crystallography beamlines. *J Synchrotron.*  
639 *Radiat.* **9**, 401-406 (2002).
- 640 58. Gonzalez, A. & Tsai, Y. Autoxds. (2010)  
641 [http://smb.slac.stanford.edu/facilities/software/xds/#autoxds\\_script](http://smb.slac.stanford.edu/facilities/software/xds/#autoxds_script).
- 642 59. Kabsch, W. XDS. *Acta Crystallogr D Biol Crystallogr* **66**, 125-132 (2010).
- 643 60. Kabsch, W., Integration, scaling, space-group assignment and post-refinement. *Acta*  
644 *Crystallogr D Biol Crystallogr* **66**, 133-414 (2010).
- 645 61. Adams, P. D. et al. PHENIX: a comprehensive Python-based system for macromolecular  
646 structure solution. *Acta Crystallogr.D* **66**, 213-221 (2010).
- 647 62. Krissinel, E. & Henrick, K. Inference of macromolecular assemblies from crystalline  
648 state. *J. Mol. Biol.* **372**, 774-797 (2007).
- 649 63. Freire, E., Schön, A. & Velazquez-Campoy, A. Chapter 5 Isothermal Titration  
650 Calorimetry: general formalism using binding polynomials. *Methods Enzymol.* **455**, 127-155  
651 (2009).

- 652 64. Duvvuri, H., Wheeler, L. C. & Harms, M. J.. pytc: open-source Python software for  
653 global analyses of isothermal titration calorimetry data. *Biochemistry* **57**, 2578-2583 (2018).
- 654 65. Dumas, P. Rigorous equations for isothermal titration calorimetry: theoretical and  
655 practical consequences. Preprint at <https://www.biorxiv.org/content/10.1101/512780v3> (2019).
- 656 66. Branch, M. A., Coleman, T. F. & Li, Y. A subspace, interior, and conjugate gradient  
657 method for large-scale bound-constrained minimization problems. *SIAM J. on Sci. Comput.* **21**,  
658 1-23 (1999).
- 659 67. Virtanen, P. et al. SciPy 1.0: fundamental algorithms for scientific computing in Python.  
660 *Nat. Methods* **17**, 261-272 (2020).
- 661 68. Williams, P. M. Bayesian regularization and pruning using a laplace prior. *Neural*  
662 *Comput.* **7**, 117-143 (1995).
- 663 69. Wu, C. F. J. Jackknife, bootstrap and other resampling methods in regression analysis.  
664 *Ann. Stat.* **14**, 1261-1295 (1986).  
665

## 666 **SUPPLEMENTARY INFORMATION**

667 Supplementary Tables, Figures and Data are available at Nature Communications online.

668

## 669 **ACKNOWLEDGMENTS**

670 We thank members of the Wedekind and Mathews labs for technical assistance and helpful  
671 discussions.

672

## 673 **FUNDING**

674 Support for this research was provided by the National Institutes of Health National Institute of  
675 General Medical Sciences (NIH NIGMS) grants R01 GM132185 to D.H.M and R01 GM063162  
676 to J.E.W. G.M.S. was supported by training grant T32 GM118283, and C.E.C was supported by  
677 training grant T32 AI049815 to J.E.W. and an Elon Huntington Hooker graduate fellowship. Use  
678 of the Stanford Synchrotron Radiation Lightsource, SLAC National Accelerator Laboratory, is  
679 supported by the U.S. Department of Energy, Office of Science, Office of Basic Energy  
680 Sciences under Contract No. DE-AC02-76SF00515. The SSRL Structural Molecular Biology  
681 Program is supported by the DOE Office of Biological and Environmental Research, and by NIH

682 NIGMS (P30 GM133894). The contents of this publication are solely the responsibility of the  
683 authors and do not necessarily represent the official views of NIH or NIGMS.

684

685 **AUTHOR CONTRIBUTIONS**

686 GMS, CEC, DHM and JEW designed experiments. GMS, MEL performed experiments. GMS,  
687 CEC, JLJ, DHM and JEW analyzed the data. GMS, CEC and JEW wrote the paper. All authors  
688 reviewed the manuscript.

689

690 **COMPETING FINANCIAL INTERESTS**

691 The authors declare no competing interests.

692

693

694

695

696

697

698

699

700



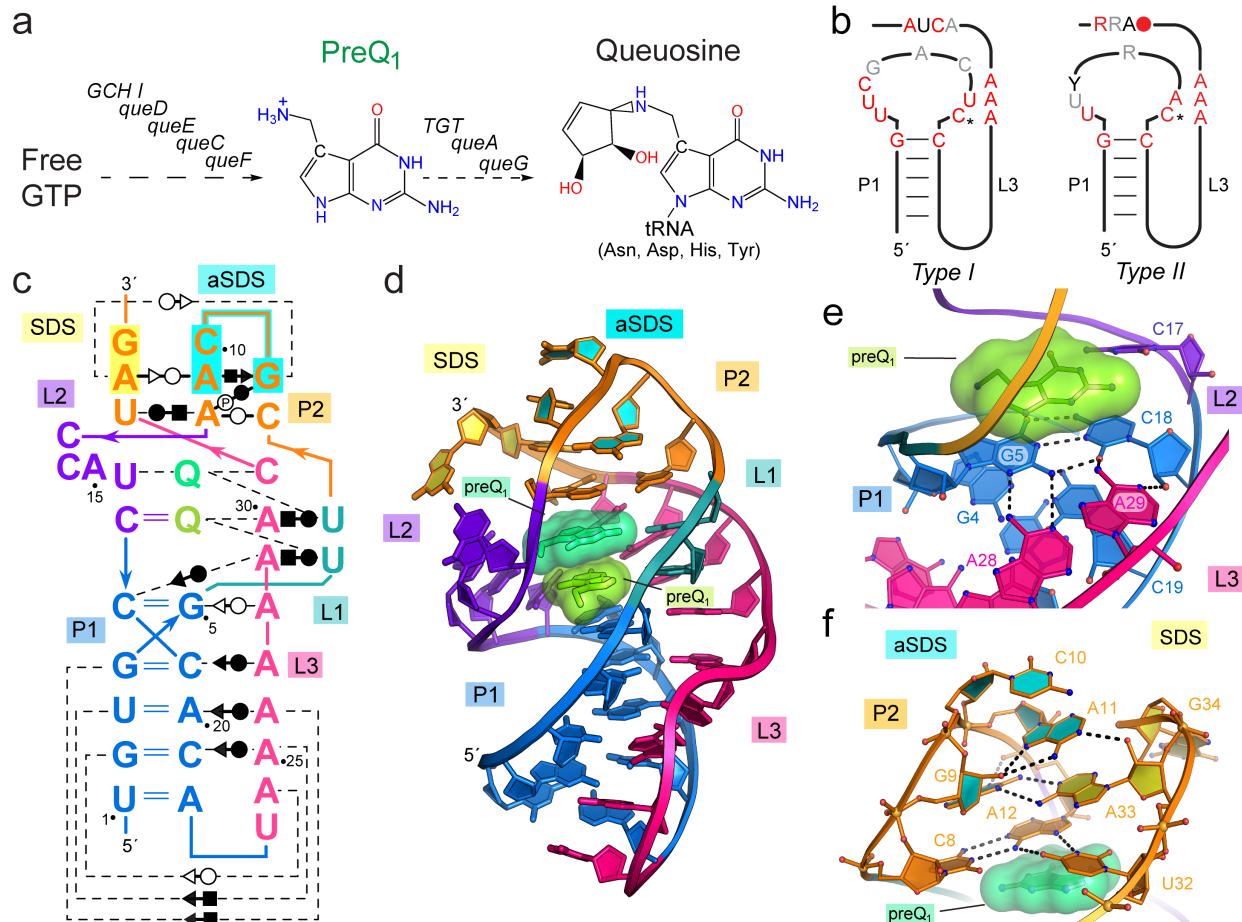

702

703 **Figure 1: Queuosine biosynthesis, the preQ<sub>1</sub> riboswitch consensus model and co-crystal**  
 704 **structure of the *Carnobacterium antarcticus* (*Can*) riboswitch.** (a) The queuosine (Q)  
 705 biosynthetic pathway proceeds through the 7-deazapurine metabolite preQ<sub>1</sub><sup>9</sup>. (b) PreQ<sub>1</sub>-I  
 706 riboswitch subtypes shown as secondary structures based on covariation<sup>28</sup>. Red, black and gray  
 707 positions indicate 97%, 90% and 75% sequence conservation. Asterisk indicates a specificity  
 708 base predicted to recognize preQ<sub>1</sub>. (c) Secondary structure of the *Can* riboswitch. Colors  
 709 correspond to specific pseudoknot base pairing (P) and loop (L) sequences. PreQ<sub>1</sub> is depicted as  
 710 "Q". Non-canonical pairing is indicated by Leontis–Westhof symbols<sup>30</sup>. The Shine-Dalgarno  
 711 sequence (SDS) and anti-(a)SDS are highlighted in yellow and cyan. (d) Ribbon diagram of the  
 712 global *Can* riboswitch fold. (e) Binding pocket floor overview wherein floor bases comprise the  
 713 A28•G5•C18 base triple. Dashed lines depict hydrogen bonds here and elsewhere. (f) Overview  
 714 of the pocket ceiling, which comprises the U32•A10•C8 base triple. The view highlights P2 bases  
 715 in the aSDS and SDS.  
 716

717  
718  
719  
720

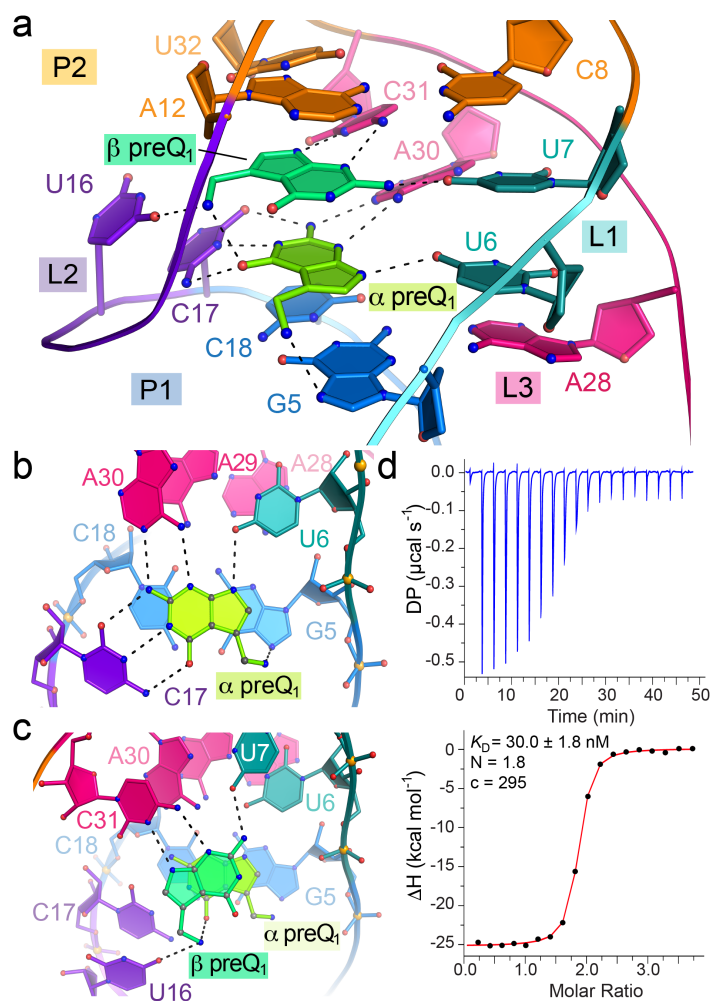

721

722 **Figure 2: The *Can* preQ<sub>1</sub>-I<sub>1</sub> riboswitch pocket with two preQ<sub>1</sub> ligands and confirmation of**  
723 **ligand-to-RNA stoichiometry.** (a) Overview of fully occupied binding pocket. Interactions in the  
724 (b)  $\alpha$  site and (c)  $\beta$  site. (d) **Representative** ITC experiment with titration of preQ<sub>1</sub> into WT *Can*  
725 RNA. The binding constant  $K_D$ , ligand-to-RNA stoichiometry  $N$ , and  $c$  value are shown.  
726

727

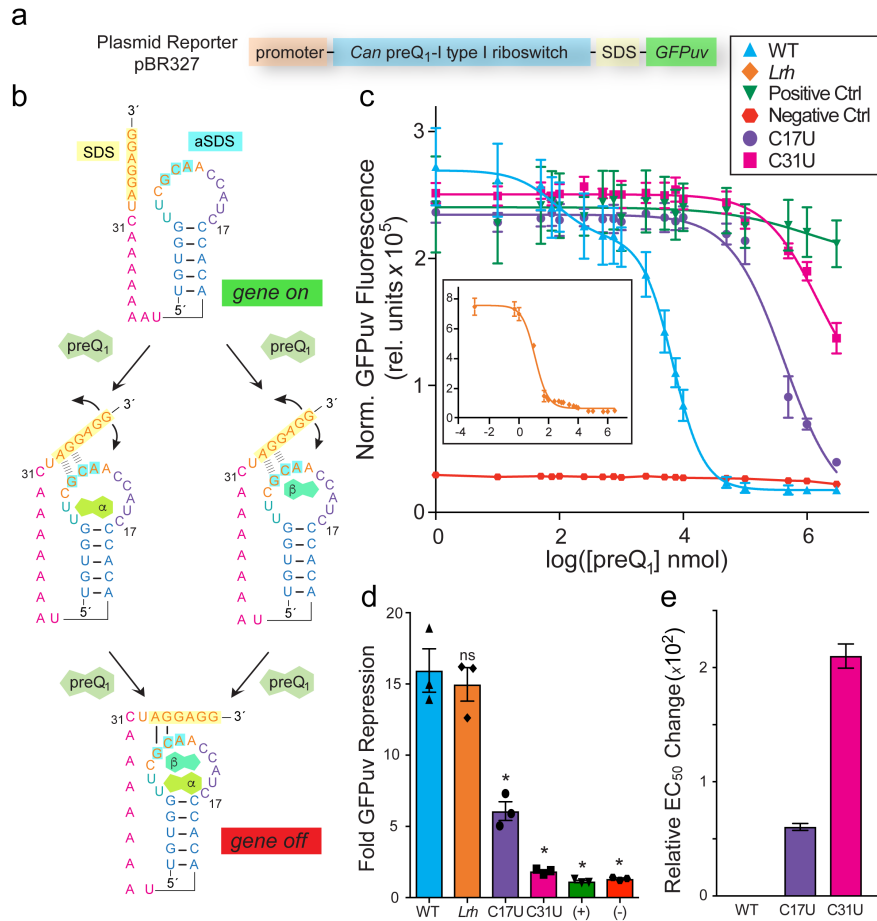

728

729 **Figure 3: Riboswitch reporter assay and dose response in live bacteria.** (a) Schematic of the  
 730 plasmid reporter. (b) Two-site binding model wherein preQ<sub>1</sub> can bind either site first. (c) **Average**  
 731 GFPuv emission dependence on preQ<sub>1</sub>; (*inset*) one-site binding by the *Lrh* preQ<sub>1</sub> riboswitch<sup>40</sup>. (d)  
 732 Bar graph showing fold repression of GFPuv emission for the *Can*, *Lrh* and mutant riboswitches  
 733 **with individual points shown**. (e) Bar graph showing fold change in **average** EC<sub>50</sub> relative to *Can*  
 734 riboswitch EC<sub>50,2</sub>. Significance was determined by a Student's *t*-test with Welch's Correction (n =  
 735 3). S.E.M. is shown in **c** and **d**; propagated errors are shown in **e**.

736

737

738

739

740

741

742

## Supplementary Information

### **A small RNA that cooperatively senses two stacked metabolites in one pocket for gene control**

Griffin M. Schroeder<sup>1,2</sup>, Chapin E. Cavender<sup>1,2</sup>, Maya E. Blau<sup>3</sup>, Jermaine L. Jenkins<sup>1,2</sup>, David H. Mathews<sup>1,2</sup> and Joseph E. Wedekind<sup>1,2</sup>

<sup>1</sup> *Department of Biochemistry & Biophysics, University of Rochester School of Medicine & Dentistry, Rochester, NY 14642, USA.*

<sup>2</sup> *Center for RNA Biology, University of Rochester School of Medicine & Dentistry, Rochester, NY 14642, USA.*

<sup>3</sup> *University of Rochester, 120 Trustee Road, Rochester, NY 14627, USA.*

*To whom correspondence should be addressed. Tel: +1 585 273-4516;  
Email: joseph.wedekind@rochester.edu*

**Supplementary Table 1: Data collection and refinement statistics (molecular replacement)**

|                                                     | PreQ <sub>1</sub> Bound Can<br>(PDB Entry 7rex) |
|-----------------------------------------------------|-------------------------------------------------|
| <b>Data collection</b>                              |                                                 |
| Space group                                         | <i>P</i> 3 <sub>2</sub> 2 1                     |
| Cell dimensions                                     |                                                 |
| <i>a</i> = <i>b</i> , <i>c</i> (Å)                  | 57.8, 153.6                                     |
| $\alpha$ = $\beta$ , $\gamma$ (°)                   | 90, 120                                         |
| Resolution (Å)                                      | 35.8 – 2.60 (2.72 – 2.60)*                      |
| <i>R</i> <sub>merge</sub> (%)                       | 9.6 (88.0)                                      |
| <i>R</i> <sub>P.I.M.</sub> (%)                      | 7.1 (66.7)                                      |
| <i>I</i> / $\sigma$ ( <i>I</i> )                    | 8.6 (2.0)                                       |
| Completeness (%)                                    | 99.6 (99.1)                                     |
| Redundancy                                          | 4.7 (4.8)                                       |
| CC1/2                                               | 0.99 (0.86)                                     |
| <b>Refinement</b>                                   |                                                 |
| Resolution (Å)                                      | 35.8 – 2.60 (2.72 – 2.60)*                      |
| No. reflections                                     | 17418                                           |
| <i>R</i> <sub>work</sub> / <i>R</i> <sub>free</sub> | 0.232/0.272                                     |
| No. atoms                                           |                                                 |
| RNA                                                 | 2042                                            |
| preQ <sub>1</sub> /ion                              | 78/4                                            |
| water                                               | 1                                               |
| <i>B</i> -factors (Å <sup>2</sup> )                 |                                                 |
| RNA                                                 | 87                                              |
| preQ <sub>1</sub>                                   | 52                                              |
| r.m.s. deviations from ideal                        |                                                 |
| Bond lengths (Å)                                    | 0.005                                           |
| Bond angles (°)                                     | 0.849                                           |
| clash score per 1000 atoms                          | 2.5                                             |

\*Parenthetical values indicate data in the highest resolution shell.

**Supplementary Table 2: Average Thermodynamic Parameters for the Wildtype Type I PreQ<sub>1</sub>-I Riboswitches**

| Sequence                           | $K_{D, app}$<br>(nM) <sup>a</sup> | N          | $\Delta H_1$<br>(kcal mol <sup>-1</sup> ) | $-T\Delta S$<br>(kcal mol <sup>-1</sup> ) | $\Delta G$<br>(kcal mol <sup>-1</sup> ) |
|------------------------------------|-----------------------------------|------------|-------------------------------------------|-------------------------------------------|-----------------------------------------|
| <i>C. antarcticus</i>              | 32.0 ± 2.0                        | 1.8 ± 0.01 | -25.5 ± 0.2                               | 15.3 ± 0.3                                | -10.3 ± 0.1                             |
| <i>H. influenzae</i> <sup>b</sup>  | 52.9 ± 0.2                        | 2.2 ± 0.03 | -25.6 ± 1.1                               | 15.6 ± 1.0                                | -10.0 ± 0.1                             |
| <i>N. gonorrhoeae</i> <sup>b</sup> | 50.5 ± 1.3                        | 2.2 ± 0.06 | -21.8 ± 1.0                               | 11.8 ± 1.0                                | -10.0 ± 0.1                             |

<sup>a</sup> Measured at 25 °C.

<sup>b</sup> Classified as type I preQ<sub>1</sub>-I riboswitch based on Roth *et al*<sup>1</sup>

**Supplementary Table 3: Average Thermodynamic Parameters for WT and Mutant Type I PreQ<sub>1</sub> Riboswitches**

| <b>Parameter</b>                             | <b>Can<sup>a</sup> WT</b>            | <b>Can<sup>b</sup> C17U</b> | <b>Can<sup>b</sup> C31U</b>   | <b>Hin<sup>c</sup> WT</b>  | <b>Ngo<sup>d</sup> WT</b>    |
|----------------------------------------------|--------------------------------------|-----------------------------|-------------------------------|----------------------------|------------------------------|
| $\Delta H_{A1}$<br>(kcal mol <sup>-1</sup> ) | -36.9<br>(-37.8, -36.3) <sup>e</sup> | -1.6<br>(-1.8, 0.2)         | 8.6<br>(7.6, 9.4)             | -40.0<br>(-40.4, -39.6)    | -35.4<br>(-36.3, -34.6)      |
| $\Delta H_{B1}$<br>(kcal mol <sup>-1</sup> ) | -29.9<br>(-31.4, -28.6)              | 0.4<br>(-1.9, 0.8)          | -17.7<br>(-18.7, -15.4)       | -26.0<br>(-26.3, -25.8)    | -31.0<br>(-31.0, -30.9)      |
| $\Delta H_{A2}$<br>(kcal mol <sup>-1</sup> ) | -47.4<br>(-48.8, -45.7)              | -4.3<br>(-4.9, -2.3)        | -23.5<br>(-25.6, -22.4)       | -55.1<br>(-55.5, -54.7)    | -37.6<br>(-39.0, -36.2)      |
| $\Delta H_{B2}$<br>(kcal mol <sup>-1</sup> ) | -40.3<br>(-40.9, -39.5)              | -2.3<br>(-4.4, -2.2)        | -49.7<br>(-51.3, -48.0)       | -41.2<br>(-41.5, -40.9)    | -33.2<br>(-34.7, -31.7)      |
| $K_{D,A1}$<br>(nM)                           | 1480.0<br>(1190.0, 1840.0)           | 5690.0<br>(5200.0, 6190.0)  | 9660.0<br>(8640.0, 11050.0)   | 3710.0<br>(3380.0, 4020.0) | 1402.0<br>(1190.0, 1670.0)   |
| $K_{D,B1}$<br>(nM)                           | 2260.0<br>(1300.0, 3650.0)           | 6950.0<br>(6210.0, 8180.0)  | 21300.0<br>(17700.0, 25300.0) | 9320.0<br>(8660.0, 9960.0) | 15500.0<br>(4920.0, 30900.0) |
| $K_{D,A2}$<br>(nM)                           | 182.0<br>(126.0, 273.0)              | 587.0<br>(492.0, 803.0)     | 3200.0<br>(2430.0, 4180.0)    | 113.0<br>(107.0, 120.0)    | 13.0<br>(7.0, 39.0)          |
| $K_{D,B2}$<br>(nM)                           | 278.0<br>(249.0, 305.0)              | 716.0<br>(605.0, 981.0)     | 7020.0<br>(6560.0, 7400.0)    | 284.0<br>(266.0, 307.0)    | 142.0<br>(120.0, 165.0)      |
| $C^f$                                        | 8.1<br>(4.5, 14.3)                   | 9.7<br>(7.3, 11.2)          | 3.0<br>(2.6, 3.6)             | 32.8<br>(29.7, 35.8)       | 109.0<br>(31.0, 249.0)       |
| $K_{D1}^g$<br>(nM)                           | 891.0<br>(630.0, 1208.0)             | 3130.0<br>(3030.0, 3220.0)  | 6640.0<br>(6420.0, 6830.0)    | 2650<br>(2470.0, 2820.0)   | 1280.0<br>(974.0, 1580.0)    |
| $K_{D2}$<br>(nM)                             | 461.0<br>(380.0, 565.0)              | 1300.0<br>(1140.0, 1750.0)  | 10260.0<br>(9460.0, 10980.0)  | 398.0<br>(379.0, 420.0)    | 156.0<br>(127.0, 200.0)      |
| $\gamma^h$                                   | 7.7<br>(4.5, 12.6)                   | 9.6<br>(7.2, 11.0)          | 2.6<br>(2.5, 2.7)             | 26.7<br>(23.6, 29.6)       | 32.9<br>(19.6, 49.1)         |

<sup>a</sup> *Carnobacterium antarcticus* (Can)

<sup>b</sup> ITC was recorded at 25 °C; all other measurements were recorded at 37 °C.

<sup>c</sup> *Haemophilus influenzae* (Hin)

<sup>d</sup> *Neisseria gonorrhoeae* (Ngo)

<sup>e</sup> Values reported are the median and confidence intervals (2.5, 97.5) from bootstrapping (See **Methods**)

<sup>f</sup> The ratio of microscopic binding constants yields the cooperativity constant  $C$ , which shows positive cooperativity when greater than unity.

<sup>g</sup> For simplicity, the microscopic binding constants can be used to generate the macroscopic binding constants,  $K_{D1}$  and  $K_{D2}$ , corresponding to the first and second ligand binding steps (**Supplemental Fig. 5b**).

<sup>h</sup> The ratio of macroscopic binding constants ( $K_{D1}$ ,  $K_{D2}$ ) multiplied by a statistical factor of 4 yields the macroscopic cooperativity constant  $\gamma$  as described in the Methods.

**Supplementary Table 4: EC<sub>50</sub> and fold change in preQ<sub>1</sub>-induced reporter-gene repression**

| <b>Riboswitch Sequence</b>             | <b>EC<sub>50,1</sub> (nM)</b> | <b>EC<sub>50,2</sub> (nM)</b> | <b>EC<sub>50</sub> Fold Change</b> | <b>Fold Repression</b> |
|----------------------------------------|-------------------------------|-------------------------------|------------------------------------|------------------------|
| <i>C. antarticus</i> WT <sup>a</sup>   | 96 ± 14                       | 7100 ± 360                    | N/A                                | 15.4 ± 1.5             |
| <i>L. rhamnosus</i> WT <sup>b</sup>    | 15 ± 0.1                      | N/A                           | N/A                                | 14.9 ± 1.2             |
| <i>C. antarticus</i> C17U <sup>b</sup> | 4.3 × 10 <sup>5</sup> ± 1     | N/A                           | 60 ± 3                             | 5.9 ± 0.7              |
| <i>C. antarticus</i> C31U <sup>b</sup> | 1.5 × 10 <sup>6</sup> ± 1     | N/A                           | 210 ± 10                           | 1.9 ± 0.1              |

<sup>a</sup> Fit with a biphasic model (see **Methods**).

<sup>b</sup> Fit with log(inhibitor) vs response (three parameters) (see **Methods**).



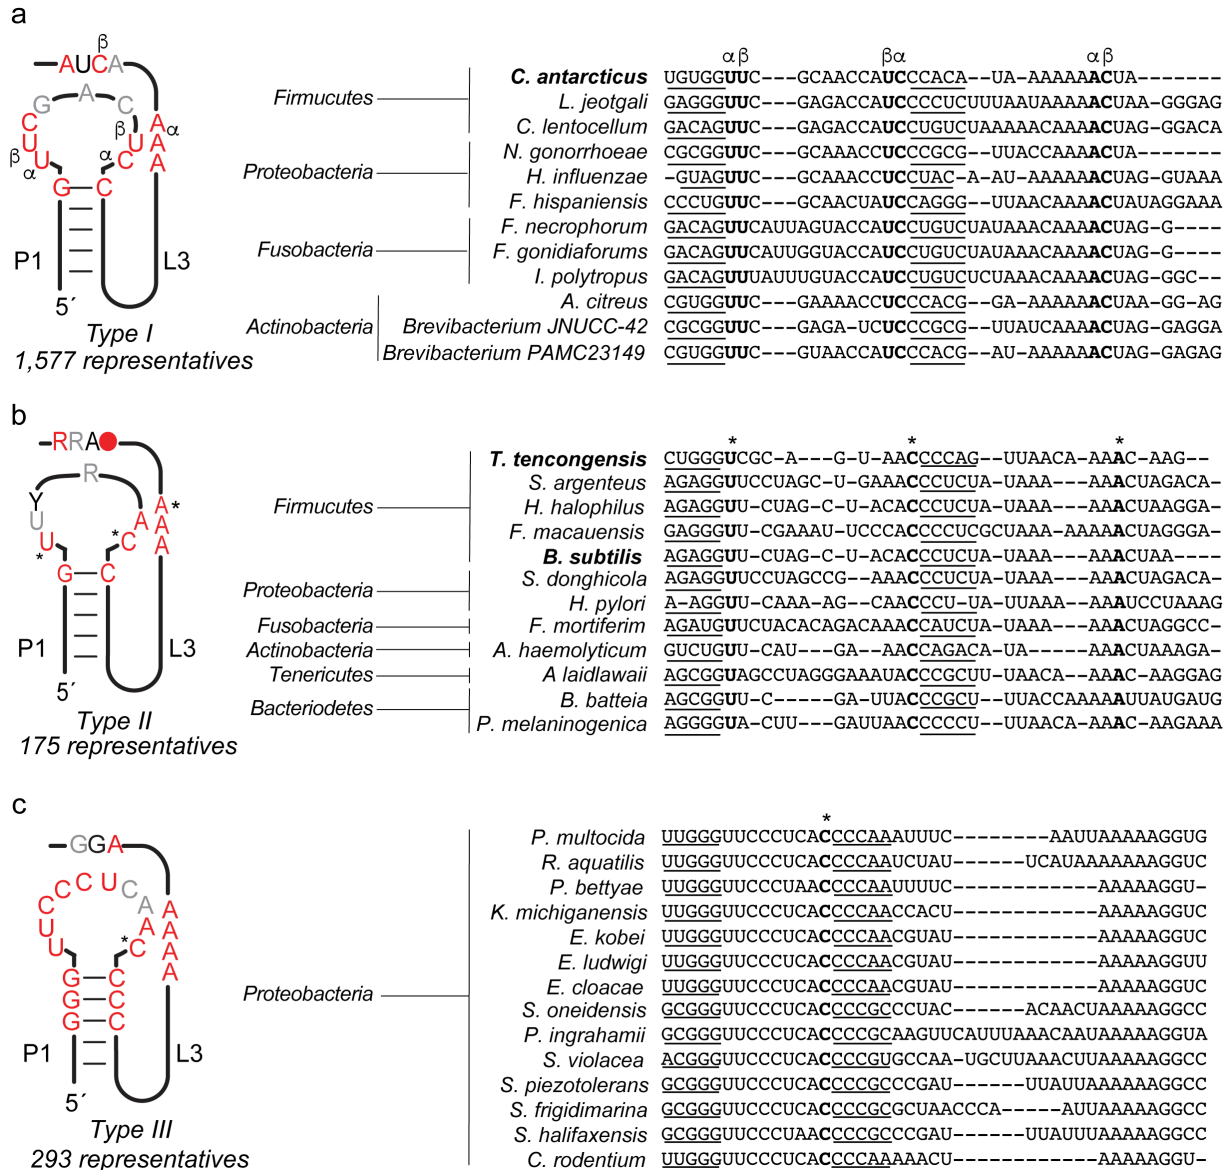

**Supplementary Figure 1 | Covariation model and multisequence alignments of preQ<sub>1</sub> class I riboswitches.** (a) Type I Covariation models generated from the full group of known sequence representatives (adapted from ref. 2); red, black and gray positions indicate 97%, 90% and 75% sequence conservation. Multisequence alignments were generated using a handful of representatives derived from phylogenetically diverse bacteria (reported by McCown *et al.*<sup>2</sup>). Positions in bold within the alignment recognize preQ<sub>1</sub> based on the *C. antarcticus* co-crystal structure of this investigation. PreQ<sub>1</sub> binding nucleobases at the  $\alpha$  and  $\beta$  sites are each denoted in the covariation model and the sequence alignment as  $\alpha$  or  $\beta$ . Here and elsewhere, bolded organisms have been structurally characterized (this work). In addition to the greatest number of representative sequences (indicated in italics), preQ<sub>1</sub>-I<sub>1</sub> riboswitches exhibit the greatest taxonomic diversity<sup>2</sup>. (b) same as (a), but with type II sequences. Characterized sequences are *T. tencongensis*<sup>3, 4</sup> and *B. subtilis*<sup>5</sup>. Asterisks denote conserved preQ<sub>1</sub> recognition positions. (c) same as (a) and (b) but with type III sequences. Due to a lack of structural characterization, the canonical specificity base is the only predicted preQ<sub>1</sub> recognition position<sup>2</sup>. Alignments were created in JALVIEW<sup>6</sup>.

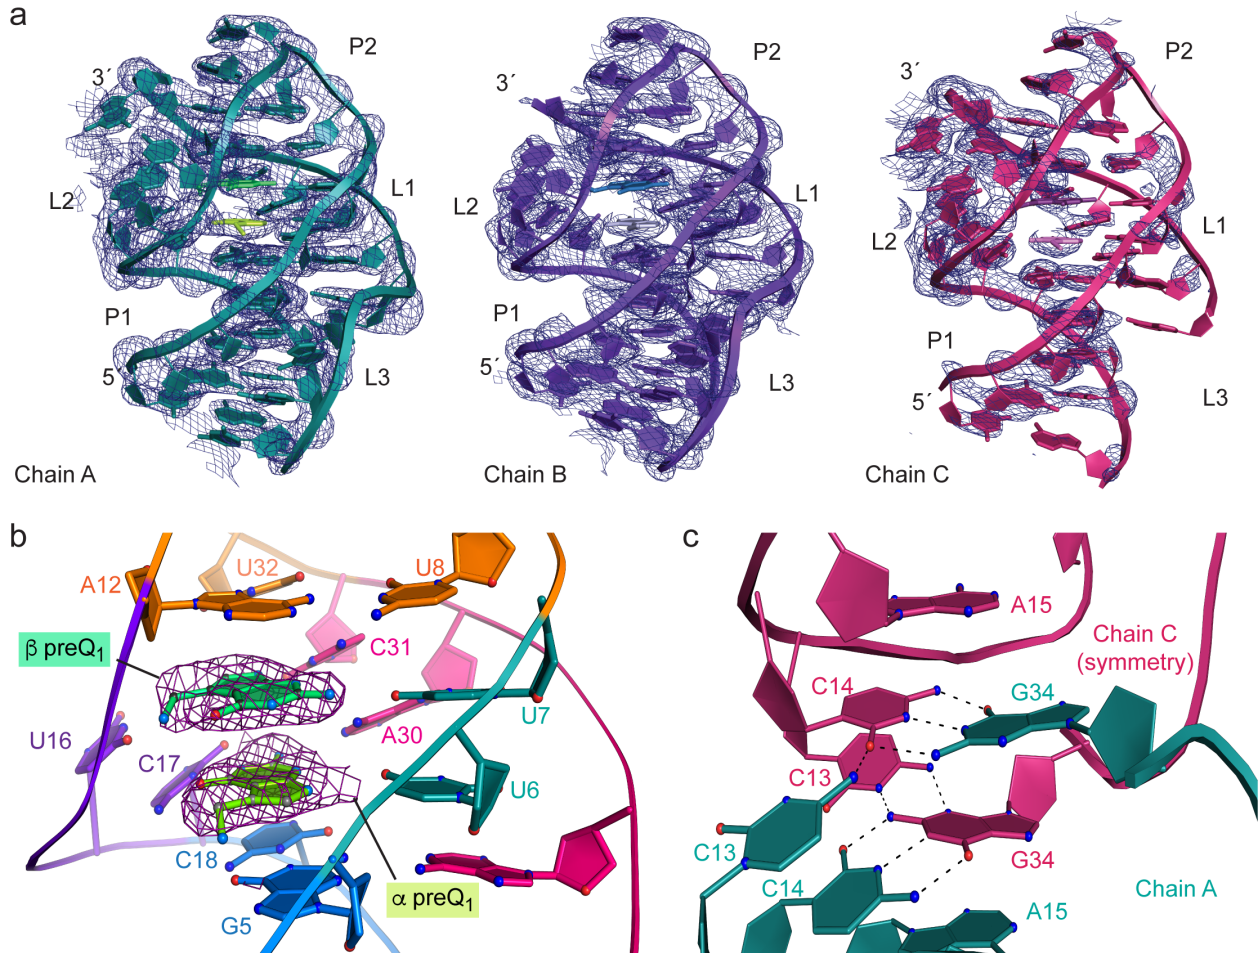

**Supplementary Figure 2 | Structural quality and details of the *C. antarcticus* preQ<sub>1</sub>-I type I riboswitch aptamer and expression platform.** (a) Reduced bias  $2mF_o-DF_c$  electron-density maps contoured at  $1.2 \sigma$  around each riboswitch chain in the asymmetric unit. Chains A and B show electron density bathing the entire model, while chain C reveals a break at the junction between P1 and the L3 loop. Individual nucleotides are shown as a cartoon diagram for simplicity. Here and elsewhere, preQ<sub>1</sub> is depicted as a ball-and-stick model (green shades in chain A). (b) Feature-enhanced, composite-omit map showing the quality of preQ<sub>1</sub> models fit to unbiased electron density<sup>7</sup>. (c) The expression platforms of chains A and C form a crystal contact that likely takes the place of an intramolecular WC pair between C10 and G34.

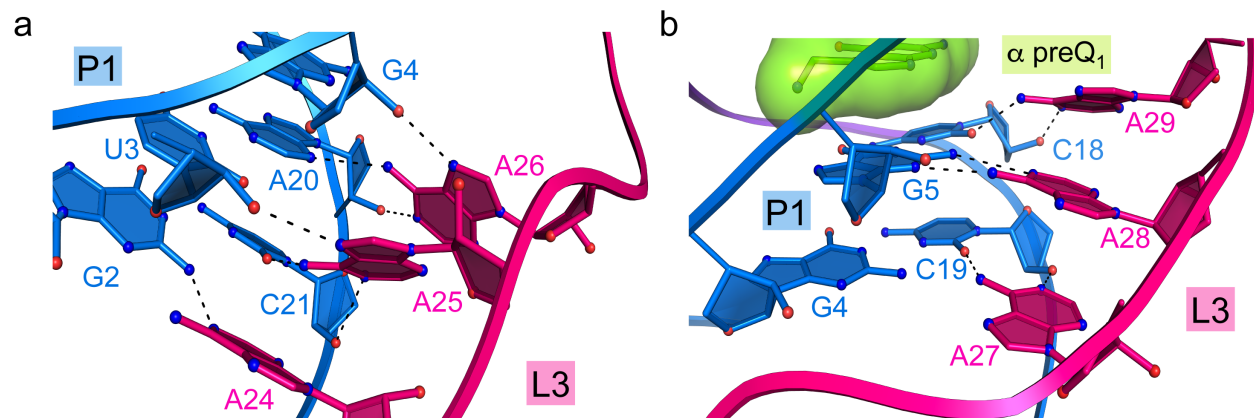

**Supplementary Figure 3 | A-amino kissing interactions between Loop 3 and the minor groove of P1.** (a) View of interactions near the base of P1 where the stem transitions to loop L3. Adenines 24, 25 and 26 engage in sugar edge interactions to P1 via their WC faces and Hoogsteen edges. (b) View of the floor of the  $\alpha$ -preQ<sub>1</sub> binding site. Adenines 27, 28 and 29 use their WC faces to pair with the sugar edges of P1 nucleotides, supporting the floor of the ligand binding pocket.

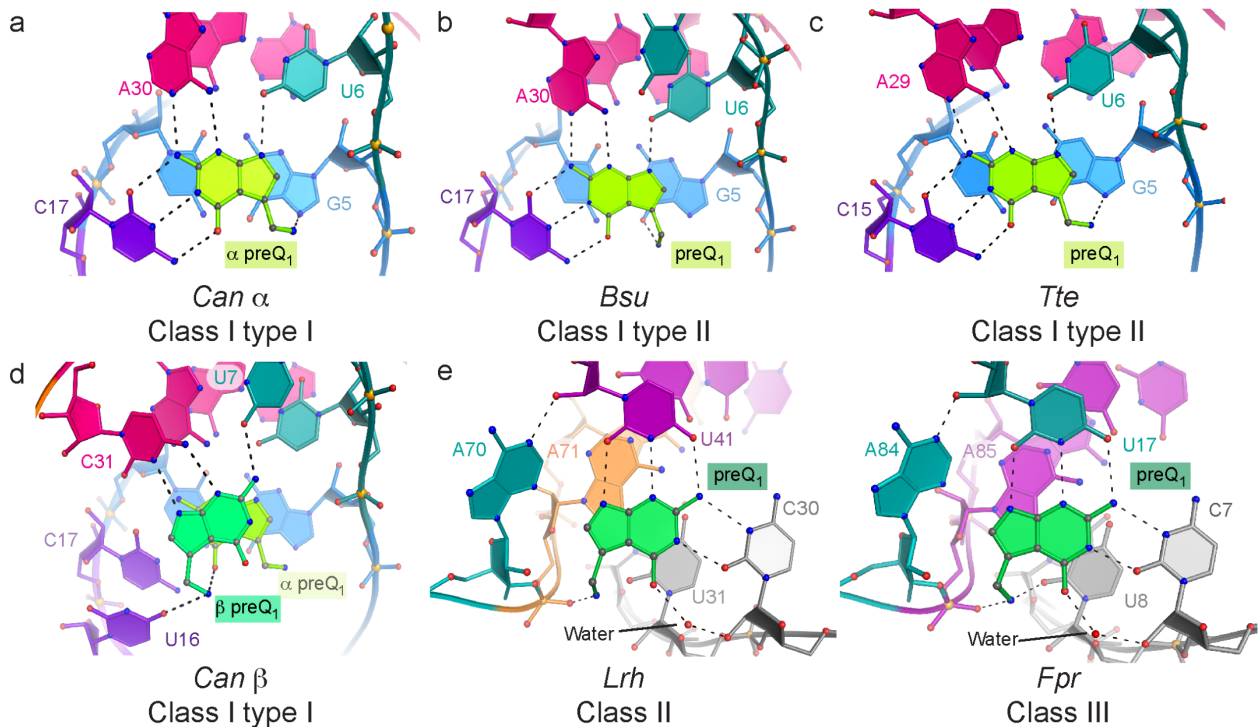

**Supplementary Figure 4 | Binding pockets of the *Can* preQ<sub>1</sub>-I<sub>1</sub> riboswitch of this investigation compared to other preQ<sub>1</sub> riboswitches.** (a) The  $\alpha$  preQ<sub>1</sub> binding site of the *Can* riboswitch. Like known class I structures in (b) and (c), preQ<sub>1</sub> sensing at the  $\alpha$  site occurs by canonical *cis* Watson-Crick (WC) pairing. (b) Binding pocket of the *B. subtilis* (*Bsu*) class I type II preQ<sub>1</sub> riboswitch<sup>5</sup>. Effector readout at this site is equivalent to the *Can* riboswitch  $\alpha$  site. (c) The binding pocket of the *T. tengcongensis* (*Tte*) class I type II preQ<sub>1</sub> riboswitch<sup>4</sup> is equivalent to b. (d) The  $\beta$  site of the *Can* riboswitch of this investigation displays a new mode of preQ<sub>1</sub> recognition of the minor-groove edge equivalent by hydrogen bonds from U7 and C31, whereas the WC face of the ligand is open. (e) PreQ<sub>1</sub> binding pockets of the class II riboswitch from *L. rhamnosus* (*Lrh*)<sup>8</sup> (left) and the class III riboswitch from *F. prausnitzii* (*Fpr*)<sup>9</sup> (right). Despite adopting different global folds, both riboswitches use a similar constellation of ten bases for ligand recognition that involves *trans* WC interactions with specificity base C30 or C7. A70 and A84 are inclined A-minor bases that originate from an orthogonal A-form helix that abuts the effector edge<sup>8, 9</sup>. In the preQ<sub>1</sub>-II riboswitch, these bases are important for gene regulation and dynamics<sup>10-12</sup>.

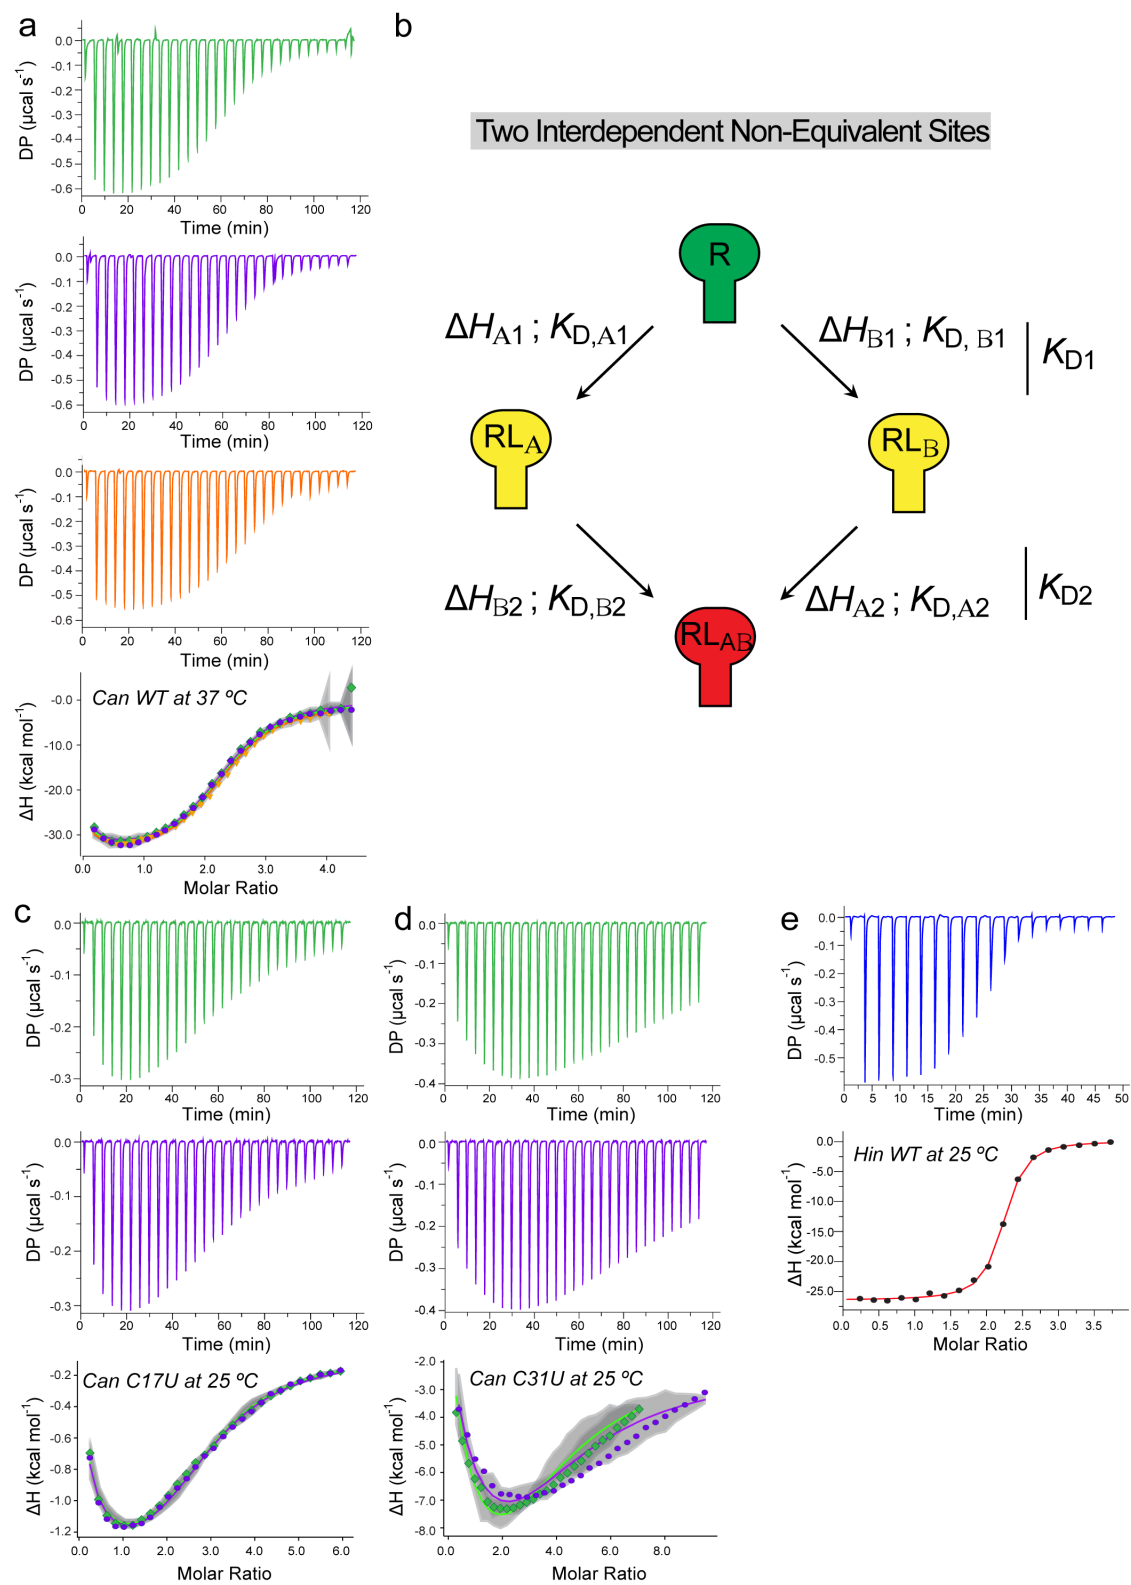

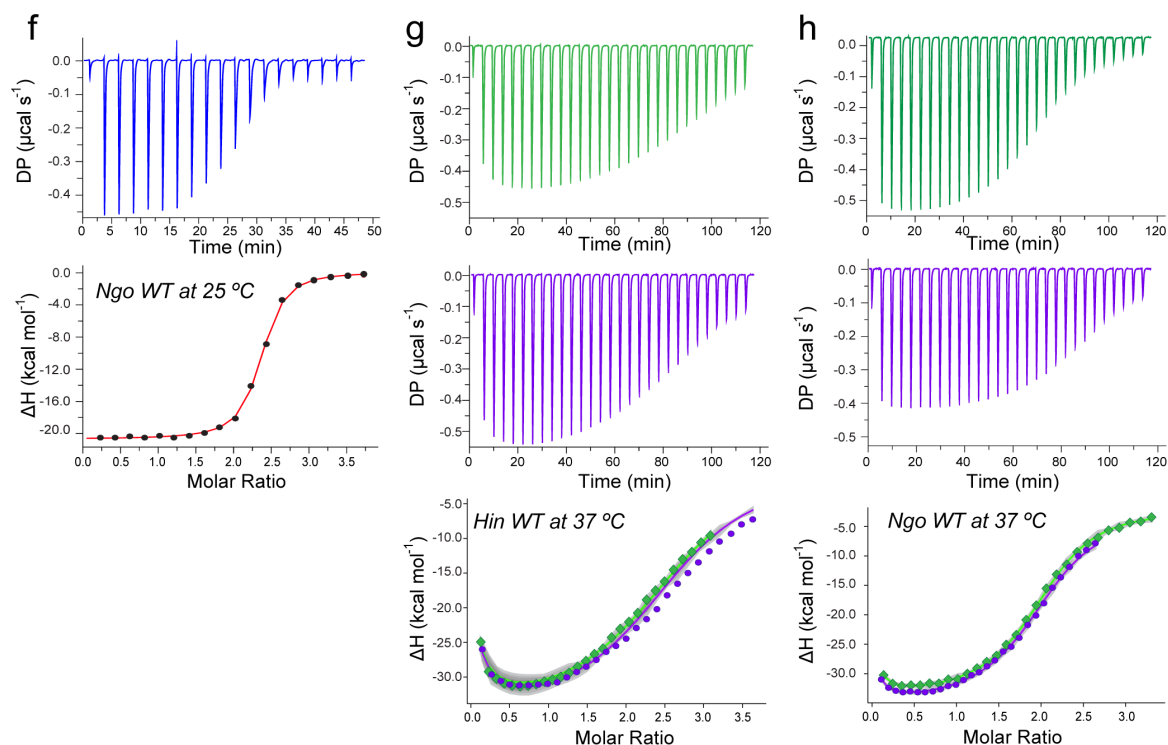

**Supplementary Figure 5 | Representative ITC thermograms and corresponding fits:** (a) Replicate thermograms and global fit of WT *C. antarcticus* (*Can*) riboswitch at 37 °C. Here and elsewhere, the gray areas represent 95% confidence intervals. (b) Schematic diagram of the two-interdependent-sites binding model used to fit cooperative isotherms of this investigation (See **Methods**). (c-d) Replicate thermograms and global fits of *Can* riboswitch mutants C17U (c) and C31U (d) at 25 °C. (e-f) Representative thermograms of WT *H. influenzae* (*Hin*) (e) and *N. gonorrhoeae* (*Ngo*) (f) performed at 25 °C and fit with an independent sites (single set of sites) binding model (Malvern Panalytical, Inc). Thermodynamic parameters are listed in **Supplementary Table 2**. (g-h) Replicate thermograms and global fits of WT *Hin* (g) and *Ngo* (h) riboswitches at 37 °C. Cooperative thermograms (a, c, d, g & h) were analyzed using a non-linear least-squared minimization fitting model developed in our lab (see **Methods**). Thermodynamic parameters for a, c, d, g & h are in **Supplementary Table 3**. Additional experimental parameters for e & f are listed in **Supplementary Table 2**.



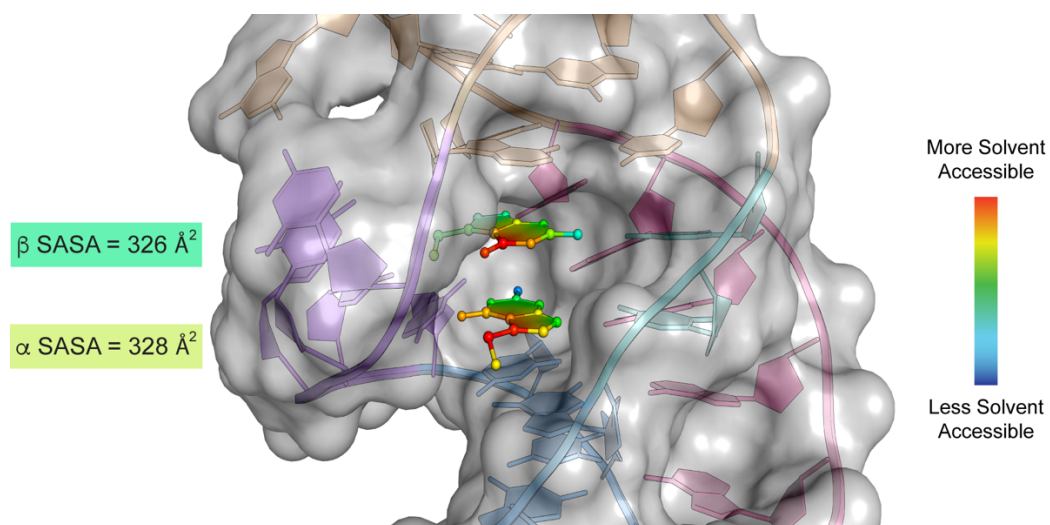

**Supplementary Figure 7 | Solvent accessibility of bound effectors.** Bound *C. antarcticus* preQ<sub>1</sub>-I<sub>1</sub> riboswitch with the atomic surface shown (semi-transparent gray). The underlying RNA is colored as in **Fig. 1a** with backbone shown as a cartoon for simplicity. Atoms in each preQ<sub>1</sub> effector are colored by solvent-accessible surface area (SASA).



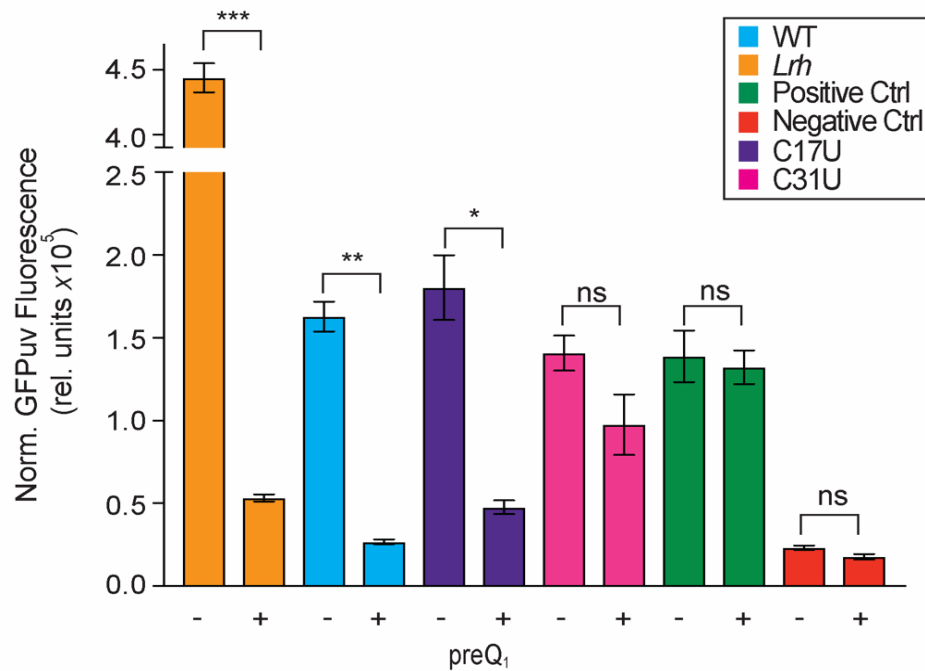

### Supplementary Figure 8 | Fluorescence emission for GFPuv constructs in live bacteria.

Normalized fluorescence emission for each riboswitch construct shows fluorescence emission in the absence of preQ<sub>1</sub> for all constructs except the negative control (red). Changes in fluorescence from GFPuv in the absence and presence of saturating preQ<sub>1</sub> (3 μM) resulted in significantly decreased emission when the reporter gene was under control of WT *L. rharnosus* (*Lrh*,  $p = 0.0006$ ) or *C. antarcticus* (*Can*,  $p = 0.0037$ ) riboswitches; partial reduction of GFPuv emission was observed for *Can* mutants C17U ( $p = 0.017$ ) and C31U ( $p > 0.05$ ). The positive and negative controls were unaffected by preQ<sub>1</sub>. The mean and standard error of the mean (S.E.M.) are reported ( $n = 3$ ). Significance was determined by a Student's *t*-test with Welch's correction ( $*p = 0.05$ ,  $**p = 0.005$ ,  $***p = 0.001$ ).

**References**

1. Roth, A. et al. A riboswitch selective for the queuosine precursor preQ<sub>1</sub> contains an unusually small aptamer domain. *Nat. Struct. Mol. Biol.* **14**, 308-17 (2007).
2. McCown, P. J., Liang, J. J., Weinberg, Z. & Breaker, R. R. Structural, functional, and taxonomic diversity of three preQ<sub>1</sub> riboswitch classes. *Chem. Biol.* **21**, 880-889 (2014).
3. Jenkins, J. L., Krucinska, J., McCarty, R. M., Bandarian, V. & Wedekind, J. E., Comparison of a preQ<sub>1</sub> riboswitch aptamer in metabolite-bound and free states with implications for gene regulation. *J. Biol. Chem* **286**, 24626-37 (2011).
4. Schroeder, G. M. et al. Analysis of a preQ<sub>1</sub>-I riboswitch in effector-free and bound states reveals a metabolite-programmed nucleobase-stacking spine that controls gene regulation. *Nucleic Acids Res.* **48**, 8146-8164 (2020).
5. Klein, D. J., Edwards, T. E. & Ferre-D'Amare, A. R., Cocrystal structure of a class I preQ<sub>1</sub> riboswitch reveals a pseudoknot recognizing an essential hypermodified nucleobase. *Nat. Struct. Mol. Biol.* **16**, 343-344 (2009).
6. Waterhouse, A. M., Procter, J. B., Martin, D. M. A., Clamp, M. & Barton, G. J., Jalview Version 2—a multiple sequence alignment editor and analysis workbench. *Bioinformatics*, 1189-1191 (2009).
7. Afonine, P. V. et al. FEM: feature-enhanced map. *Acta Crystallogr. D* **71**, 646-666 (2015).
8. Liberman, J. A., Salim, M., Krucinska, J. & Wedekind, J. E. Structure of a class II preQ<sub>1</sub> riboswitch reveals ligand recognition by a new fold. *Nat. Chem. Biol.* **9**, 353-355 (2013).
9. Liberman, J. A. et al. Structural analysis of a class III preQ<sub>1</sub> riboswitch reveals an aptamer distant from a ribosome-binding site regulated by fast dynamics. *Proc. Natl. Acad. Sci. U. S. A.* **112**, E3485-94 (2015).
10. Dutta, D. & Wedekind, J. E., Nucleobase mutants of a bacterial preQ<sub>1</sub>-II riboswitch that uncouple metabolite sensing from gene regulation. *J. Biol. Chem.* **295**, 2555-2567 (2020).
11. Soulière, M. F. et al. Tuning a riboswitch response through structural extension of a pseudoknot. *Proc. Natl. Acad. Sci. U. S. A.* **110**, E3256–E3264 (2013).
12. Kang, M., Eichhorn, C. D. & Feigon, J. Structural determinants for ligand capture by a class II preQ<sub>1</sub> riboswitch. *Proc. Natl. Acad. Sci. U. S. A.* **111**, E663-E671 (2014).
13. Peselis, A. & Serganov, A. Structure and function of pseudoknots involved in gene expression control. *Wiley Interdiscip. Rev. RNA* **5**, 803-822 (2014).
14. Spitale, R. C., Torelli, A. T., Krucinska, J., Bandarian, V. & Wedekind, J. E. The structural basis for recognition of the preQ<sub>0</sub> metabolite by an unusually small riboswitch aptamer domain. *J Biol. Chem.* **284**, 11012-11016 (2009).

15. Kang, M.; Peterson, R. & Feigon, J. Structural Insights into riboswitch control of the biosynthesis of queuosine, a modified nucleotide found in the anticodon of tRNA. *Mol. Cell* **33**, 784-90 (2009).

**<b>REVIEWERS' COMMENTS</b>**

**Reviewer #1 (Remarks to the Author):**

In this revised manuscript, the authors have provided a detailed set of point-by-point responses with associated changes to the manuscript, where appropriate. In light of the comments raised by the reviews, the authors have reconsidered their analysis and interpretation of some of their data, such as the cell-based reporter assays, and provided additional information such as the phylogenetic alignment to provide further information about this novel subclass of preQ1 riboswitches. None of these changes significantly altered the original findings or conclusions, but rather serve to clarify key observations and conclusions. These revisions, in the opinion of this reviewer, have fully addressed all of the concerns raised and the current form of the manuscript is suitable for publication.

**Reviewer #2 (Remarks to the Author):**

All my concerns were addressed appropriately. The very colorful, as in full of colors, response addresses well all previous points raised.

**Reviewer #3 (Remarks to the Author):**

Thank you to the authors for responding to our comments. The authors have addressed our concerns and I think revised manuscript is suitable for publication.
